# Supplementary material
Source: Research Square preprint supplement (doi:10.21203/rs.3.rs-9896586/v1)
Supplement: Supplementary file 1 [file 9ddc522312f57b32a9a3a54f.xlsx]

## Sheet: Sheet1
Name	Gender	Age	Grade	BMI	NEU#	LYM#
####	F	67	3	31.96	4.3	1.3
####	F	76	4	33.3	2.7	2.1
####	F	73	4	22.06	3.9	1.3
####	M	79	4	25.71	2.5	1
####	F	38	2	28.93	2.6	1.4
####	M	75	3	27.78	2.4	1.6
####	M	71	4	25.78	2.9	2
####	M	83	4	23.34	3.8	1.2
####	F	82	3	32.39	3.8	2.8
####	F	79	4	26.23	2.8	1
####	F	77	3	29.87	2.7	1.7
####	F	77	4	23.34	1.8	1.4
####	F	57	4	33.69	3.1	1.3
####	F	66	3	24.22	2.4	1.7
####	M	68	4	20.66	2	2
####	F	55	4	28.57	2.6	1.6
####	M	71	4	25.79	3.9	1.2
####	M	59	3	27.04	5.2	2.6
####	F	78	4	27.34	3.1	1.3
####	F	52	4	21.48	3.7	1.2
####	F	40	4		5.6	1.9
####	F	66	3	33.71	2.3	1.6
####	M	69	4	24.54	2.8	1.4
####	F	82	3	32.39	3.8	2.8
####	F	60	4	24	4.5	2
####	F	73	3	34.71	3.8	2
####	M	59	4	30.12	2.3	1.5
####	M	70	4	28.9	5.5	1.9
####	F	52	4	27.34	6.8	3.5
####	F	76	4	25.33	4.1	2.6
####	F	68	4	24.39	2.7	2.9
####	M	71	4	25.79	3.9	1.6
####	F	72	4	27.77	5.7	1.4
####	F	67	4		2.4	1.6
####	M	55	4	28.09	3.2	2.3
####	M	47	3	24.73	4.5	2.3
####	F	71	4	24.03	5.7	1.6
####	M	56	4	26.95	4.1	1.3
####	F	59	3	23.88	2.4	2.7
####	M	74	4	26.23	3.5	2.2
####	M	56	3	20.86	3.3	1.2
####	F	60	3	27.82	4.7	1.9
####	F	57	4	24.8	2.3	1.2
####	M	70	4	26.23	4.6	1.2
####	F	70	4	25.54	4	2.3
####	M	92	3	19.49	1.5	2
####	F	70	3	23.14	3.7	1.8
####	M	53	4	19.15	2	1.2
####	M	48	4	29.03	5	1.6
####	M	67	4	22.31	2.6	1.9
####	F	63	4	26.71	2.5	2.9
####	M	53	4	24.16	3.3	1.1
####	M	59	4	21.63	1.7	1.5
####	M	52	4	27.46	3.2	1.8
####	M	58	4	26.5	1.7	1
####	F	72	3	24.34	3.9	1.6
####	F	80	4	20.33	4.4	1.8
####	M	36	3	28.72	5.2	2
####	M	55	4	28.13	3.7	1.9
####	M	55	4	26.67	2.7	1.8
####	M	70	4	22.84	3.9	1.4
####	F	72	3	26.49	1.7	2
####	M	85	4	29.71	4	0.7
####	F	75	4	19.1	4.1	2.9
####	F	62	4	21.7	9.1	0.9
####	M	61	4	28.58	5.6	2.5
####	M	65	4	29.07	2.5	1.7
####	M	62	4	27.68	3.9	2.1
####	M	70	4	18.26	2.7	0.8
####	F	92	3	21.07	1.9	0.8
####	M	67	3	33.03	3.7	2
####	M	53	4	22.91	3.5	1.6
####	F	72	3	30.33	2.8	1.9
####	F	60	4	24.5	2.4	1.8
####	M	75	3	30.42	1.6	1.2
####	M	56	4	24.5	3.6	1.3
####	F	73	3	22.64	2.6	1.6
####	F	50	3	23.24	2.4	2
####	F	45	3	25.28	2.5	2.7
####	F	54	4	19.82	4.4	2
####	M	71	4	26.75	2.8	1.5
####	F	63	3	24.56	2.1	0.9
####	F	71	4	32.39	3.2	1.7
####	M	43	4	24.49	8.6	3.8
####	F	57	4	19.53	4.1	2
####	F	62	4	23.62	2.8	2.2
####	F	80	4	25.3	2.6	2.5
####	F	42	3	22.15	3	2.2
####	M	44	3	28.52	3.1	1.5
####	M	67	4	22.27	2.5	1
####	M	67	4	26.62	2.8	2.2
####	M	78	4	23.03	4	1.7
####	F	40	4	24.54	3.9	2.2
####	F	58	4	25.72	2.7	1.6
####	M	57	3	23.71	1.8	1.6
####	M	74	4	33.18	3.4	3.3
####	M	52	4	25.06	3.1	3
####	M	85	4	19.81	5	1.5
####	M	46	4	23.66	4.2	1.5
####	F	74	4	26.23	4.6	3.2
####	F	75	3	30.7	6.3	1.4
####	M	62	4	23.51	4.5	3.1
####	F	48	4	21.99	5	2
####	M	61	4	30.8	3.9	1.4
####	F	77	4	18.59	2.6	1.4
####	F	80	4	18.59	5.2	1.2
####	F	50	3	27.55	3.5	1.6
####	F	70	3	28.04	2.5	1.5
####	F	74	3	29.94	3.9	1.9
####	F	63	4	18.86	2.6	1.5
####	F	40	3	19.47	3.2	2.4
####	F	74	4	27.12	4.1	3.2
####	M	81	3	21.97	7.3	1.2
####	M	31	3	23.39	3.1	2.1
####	F	55	3	19.56	2.1	0.9
####	M	62	4	27.97	5.1	3.2
####	M	62	4	25.61	6.1	2.5
####	F	71	3	25.35	4.4	2.1
####	F	39	3	27.34	3.4	1.1
####	F	57	4	22.86	2.4	1.8
####	F	74	4	26.71	2.7	1.6
####	M	60	4	30.42	2.2	2.3
####	F	20	4	20.44	3.8	3.1
####	M	80	4	28.37	2.9	1.2
####	F	56	3	22.89	2.6	1.9
####	F	76	4	29.3	2.2	1.9
####	F	71	4	27.34	2.9	1.2
####	M	54	4	25.61	2.8	2.4
####	M	58	3	23.15	2.3	1.7
####	F	75	4	22.36	4.7	2.5
####	M	60	4	27.14	3.9	2.9
####	F	64	4	27.69	2.3	1.2
####	F	63	4	26.31	3.4	3
####	M	39	4	20.16	4	1.2
####	M	63	4	25.91	5.7	1.3
####	M	56	4	28.34	6.8	1.4
####	F	61	4	28.31	5	2.2
####	F	60	4	18.9	1.2	0.9
####	M	75	4	26.84	3.6	0.8
####	M	59	3	20.96	4.1	2.7
####	F	72	3	28.68	3.4	2.9
####	M	61	4	28.56	2.3	1.4
####	M	79	3	25.95	5.2	2
####	M	64	3	28.4	2.9	1.4
####	M	34	3	30.42	5.2	3.1
####	F	79	4	18.03	3.1	1.3
####	M	56	3	20.28	4.2	2
####	M	57	4	21.51	3.4	1.2
####	F	53	4	23.11	2.5	1.9
####	F	58	4	22.21	3.7	3.1
####	F	59	3	28.84	3.3	1.7
####	F	67	4	24.06	2.4	1.5
####	M	63	4	22.09	4	2.4
####	F	62	3	26.23	2.7	1.8
####	F	35	4	20.21	2.5	1.6
####	M	60	4	24.49	5.1	2.2
####	F	67	3	29.69	3.9	1.8
####	F	55	4	28.89	3.5	1.7
####	F	66	3	20.69	3.4	2.1
####	M	62	4	22.86	3.2	1.8
####	M	74	4	32.22	5.1	1.6
####	F	56	3	21.8	3.7	1.7
####	F	57	4	22.59	4.5	2.9
####	F	56	4	23.14	5.7	1.1
####	M	62	3	23.62	13.6	1.1
####	F	49	3	20.96	3	2.3
####	F	62	3	39.13	3.6	1.8
####	F	60	4	24	4.5	2
####	M	45	3	21.6	8.7	1.7
####	F	64	4	23.53	3.2	1.3
####	M	63	4	20.81	3.7	1.5
####	F	65	3	27.11	4.4	2
####	M	68	3	24.68	2.8	1.6
####	F	70	3	26.82	3.6	2.4
####	F	61	4	26.56	4.5	1.3
####	F	55	3	22.67	1.7	2.2
####	F	34	3	22.58	5.3	2.3
####	F	55	4	26.67	3.4	2
####	M	51	3	27.68	3.1	1.5
####	M	78	3	26.33	4.7	1.9
####	F	64	4	35.56	2.8	1.1
####	M	54	3	26.12	3.3	1.8
####	M	58	4	22.48	9.8	1
####	F	73	4	33.25	3.5	1.5
####	M	68	3	25.86	5.6	1.5
####	F	52	3	21.41	3.4	2.7
####	F	40	3	19.83	3.2	2.4
####	F	65	4	26.71	2	1.8
####	F	61	3	20.7	1.8	1.4
####	F	69	3	24.14	3.4	2
####	M	68	3	24.8	3.3	1.1
####	F	75	3	27.94	3.6	1.6
####	F	48	3	27.27	4.1	1.7
####	F	40	4	31.22	5.3	3
####	F	58	4	27.56	2.2	1.7
####	F	34	4	20.55	2	1.2
####	F	58	3	24.22	4.3	1.2
####	F	63	4	25.3	2.8	1
####	M	59	3	25.56	3.7	1.6
####	M	73	4	26.99	2	1
####	M	51	4	28.13	2.8	1.4
####	F	54	3	27.06	2.9	2.9
####	M	51	4	23.45	3.4	1.7
####	F	77	4	29.17	2.6	1.8
####	F	47	3	25.44	3.1	2.1
####	M	70	3	19.47	2.7	0.8
####	M	66	4	31.25	3.1	1.4
####	F	70	4	23.98	2.3	1.1
####	M	35	4	19.68	3.3	1.5
####	F	55	3	29.55	3.8	3.2
