# Supplementary material
Source: Research Square preprint supplement (doi:10.21203/rs.3.rs-9896586/v1)
Supplement: Supplementary file 2 [file a9c83eb6afcf694b86d75425.xlsx]

## Sheet: Sheet1
Name	Gender	Age	NEU#	NEU%	LYM#	LYM%
###	F	24	3.82	51.3	2.83	37.9
###	F	25	3.97	54.5	2.61	35.9
###	F	26	5.74	61.8	2.59	27.8
###	F	25	6.30	61.4	3.15	30.7
###	F	24	3.61	50.4	2.89	40.4
###	F	31	4.32	67.6	1.53	23.9
###	F	24	4.63	52.9	3.27	37.5
###	F	23	4.61	65.2	1.89	26.7
###	F	24	3.98	46.9	3.80	44.8
###	F	22	2.65	54.2	1.75	35.8
###	F	32	3.21	54.8	2.22	37.9
###	F	27	2.78	51.3	1.99	36.7
###	F	25	3.44	52.3	2.41	36.7
###	F	25	4.93	65.4	2.11	28.0
###	F	24	3.55	54.4	2.24	34.3
###	F	32	3.17	61.4	1.71	33.1
###	F	25	2.97	59.5	1.53	30.7
###	F	22	4.43	59.5	2.54	34.0
###	F	23	2.44	45.9	2.33	43.9
###	F	24	2.37	47.9	2.20	44.4
###	F	39	2.73	55.7	1.76	35.8
###	F	23	3.55	49.8	3.01	42.3
###	F	26	3.49	62.5	1.58	28.3
###	F	23	3.16	57.2	1.71	30.9
###	F	24	4.17	67.3	1.58	25.4
###	F	30	3.42	54.4	2.26	35.9
###	F	21	4.07	55.2	2.43	33.0
###	F	25	2.46	49.7	1.90	38.4
###	F	24	5.78	63.2	2.66	29.1
###	F	27	2.00	51.3	1.67	42.8
###	F	23	3.00	54.4	1.89	34.3
###	F	24	2.93	50.2	2.16	37.0
###	F	24	5.43	64.8	2.04	24.3
###	F	23	2.23	41.8	2.42	45.4
###	F	24	3.97	51.7	2.83	36.8
###	F	31	3.19	60.1	1.87	35.3
###	F	24	4.35	60.9	2.20	30.8
###	F	26	2.54	50.3	2.00	39.6
###	F	24	2.19	40.2	2.90	53.4
###	F	21	1.99	36.7	2.73	50.5
###	F	26	2.30	43.7	2.54	48.2
###	F	22	4.76	67.8	1.63	23.3
###	F	21	5.31	65.0	2.31	28.3
###	F	36	3.68	57.3	1.84	28.7
###	F	47	3.16	55.6	1.90	33.5
###	F	35	5.13	69.3	1.70	22.9
###	F	24	5.54	63.1	2.49	28.4
###	F	23	2.88	46.2	2.63	42.1
###	F	24	6.41	67.2	2.56	26.8
###	F	34	2.93	65.9	1.03	23.1
###	F	34	3.10	52.5	2.17	36.8
###	F	30	2.35	54.1	1.63	37.6
###	F	24	3.48	48.0	2.89	39.9
###	F	26	3.34	65.2	1.28	25.0
###	F	31	2.59	47.0	2.43	44.1
###	F	34	2.04	52.1	1.47	37.5
###	F	36	3.74	59.7	1.82	29.0
###	F	25	3.31	56.3	1.97	33.4
###	F	26	3.05	58.5	1.78	34.2
###	F	31	4.86	62.7	2.08	26.9
###	F	32	3.44	48.1	2.84	39.8
###	F	22	1.21	35.5	1.54	45.3
###	F	34	3.96	60.6	1.88	28.7
###	F	27	4.87	60.4	2.52	31.3
###	F	31	3.03	59.7	1.60	31.6
###	F	38	2.72	49.3	2.27	41.0
###	F	24	5.68	56.3	3.64	36.0
###	F	23	2.23	41.1	2.48	45.8
###	F	24	1.97	41.8	2.23	47.2
###	F	29	2.87	56.7	1.66	32.8
###	F	33	5.87	69.1	1.95	23.0
###	F	28	4.18	49.5	3.47	41.2
###	F	29	6.48	67.1	2.28	23.6
###	F	36	4.09	62.4	1.85	28.2
###	F	49	3.75	62.1	1.77	29.3
###	F	30	3.80	68.5	1.18	21.3
###	F	29	2.43	51.9	1.75	37.3
###	F	29	2.70	45.9	2.75	46.7
###	F	27	3.27	50.4	2.76	42.5
###	F	31	6.36	73.5	1.77	20.4
###	M	18	4.52	61.6	2.10	28.6
###	M	46	4.40	65.4	1.58	23.5
###	F	27	5.35	60.2	2.58	29.1
###	F	34	2.79	56.3	1.75	35.4
###	F	29	3.91	55.2	2.41	34.0
###	F	28	3.70	58.7	2.04	32.4
###	F	48	3.64	63.3	1.47	25.6
###	F	30	2.27	46.6	1.83	37.6
###	F	48	2.25	46.4	1.97	40.5
###	F	28	2.70	49.6	2.14	39.3
###	M	34	3.68	59.0	1.79	28.7
###	M	38	3.87	57.5	2.32	34.5
###	F	30	4.39	60.6	1.99	27.4
###	F	29	2.07	43.5	2.29	48.1
###	F	27	3.30	51.9	2.43	38.2
###	M	25	3.17	58.7	1.68	31.2
###	M	31	2.76	48.4	2.29	40.2
###	F	30	2.80	54.2	1.75	33.8
###	F	27	5.20	60.7	2.42	28.2
###	F	29	2.33	46.0	2.27	44.9
###	F	28	2.80	48.4	2.52	43.4
###	M	42	2.47	52.6	1.78	37.9
###	F	29	2.68	56.3	1.54	32.4
###	F	33	4.31	66.4	1.33	20.5
###	F	29	1.95	50.2	1.56	40.1
###	F	35	2.85	59.7	1.52	31.9
###	M	20	3.87	64.7	1.37	22.9
###	F	29	2.56	50.2	1.93	37.8
###	F	23	5.56	58.6	2.85	30.1
###	F	29	2.89	51.8	2.28	40.9
###	F	35	4.33	67.1	1.60	24.8
###	F	68	8.40	79.9	1.76	16.8
###	F	30	4.75	62.2	2.16	28.3
###	F	29	2.34	39.1	2.99	50.0
###	F	30	2.09	44.5	2.13	45.3
###	F	27	3.21	48.9	2.73	41.7
###	F	29	3.94	57.8	2.30	33.7
###	F	27	2.96	63.7	1.35	29.0
###	F	27	3.23	46.9	2.82	41.0
###	F	28	2.88	54.0	1.97	37.0
###	M	21	6.81	67.7	2.17	21.5
###	F	29	2.94	46.9	2.72	43.5
###	F	28	3.38	49.8	2.63	38.8
###	F	30	2.66	61.1	1.41	32.4
###	F	28	2.72	60.8	1.46	32.7
###	F	34	3.24	49.0	2.87	43.4
###	F	30	4.36	52.5	3.53	42.5
###	F	29	1.64	47.6	1.43	41.6
###	F	29	3.15	56.6	1.94	34.8
###	F	27	2.73	51.7	1.99	37.7
###	M	43	5.09	67.5	1.70	22.5
###	F	31	3.27	55.3	2.06	34.9
###	F	27	1.84	45.9	1.75	43.6
###	F	30	3.58	56.5	2.03	32.1
###	M	26	4.17	48.4	3.41	39.6
###	F	34	2.83	56.2	1.63	32.3
###	F	29	3.73	59.9	1.81	29.1
###	F	27	1.98	41.1	2.39	49.6
###	F	37	2.68	50.5	2.04	38.5
###	F	28	2.63	53.3	1.94	39.4
###	F	27	6.26	68.8	2.12	23.3
###	F	30	2.80	54.5	1.87	36.4
###	F	29	3.74	50.3	2.89	38.8
###	F	28	4.01	50.5	3.28	41.4
###	F	29	2.90	51.5	2.30	40.9
###	F	42	2.11	47.6	1.74	39.3
###	F	25	3.84	65.2	1.64	27.8
###	F	29	2.57	53.5	1.78	37.0
###	F	32	2.16	47.4	1.92	42.1
###	M	26	4.74	58.0	2.58	31.6
###	F	27	6.52	59.9	3.25	29.8
###	F	22	3.88	40.6	4.59	48.0
###	F	31	3.17	54.3	2.15	36.8
###	F	31	3.93	64.1	1.72	28.1
###	F	32	2.34	49.4	1.93	40.7
###	F	24	3.83	53.7	2.66	37.3
###	F	31	3.16	56.0	1.95	34.6
###	F	31	2.96	46.3	2.70	42.3
###	F	34	2.71	52.4	2.05	39.7
###	F	30	6.00	62.1	3.02	31.2
###	F	27	5.87	67.7	2.24	25.8
###	F	31	3.31	52.4	2.43	38.5
###	F	31	5.38	70.2	1.77	23.1
###	F	33	1.99	43.1	2.24	48.6
###	F	33	2.63	50.9	2.09	40.5
###	F	29	4.11	62.7	1.94	29.6
###	M	27	2.20	46.6	1.96	41.5
###	F	31	4.25	51.0	3.46	41.6
###	F	31	2.66	51.0	2.12	40.6
###	F	33	3.41	60.1	1.78	31.3
###	F	40	3.09	54.0	2.18	38.0
###	M	25	3.68	53.5	2.34	34.0
###	F	27	3.97	56.5	2.40	34.2
###	F	31	3.83	54.3	2.68	38.0
###	F	28	4.30	54.0	3.15	39.6
###	F	29	4.61	59.8	2.72	35.3
###	F	29	3.17	54.7	2.10	36.3
###	F	30	4.00	57.8	2.18	31.5
###	F	31	5.31	66.6	2.03	25.5
###	M	29	5.50	70.5	1.59	20.4
###	F	29	2.27	46.8	2.04	42.1
###	M	48	2.96	54.5	1.86	34.3
###	F	33	3.20	53.6	2.27	38.0
###	F	31	3.75	59.2	2.10	33.2
###	F	30	2.56	57.6	1.27	28.6
###	F	42	3.92	58.4	1.97	29.3
###	M	41	4.73	58.5	2.56	31.7
###	M	55	2.46	46.1	2.38	44.7
###	F	31	3.26	55.6	1.97	33.6
###	M	31	3.97	48.9	3.44	42.4
###	F	30	4.32	56.1	2.70	35.2
###	M	24	4.05	53.9	2.56	34.1
###	F	27	2.39	43.9	2.61	48.1
###	F	33	3.48	63.0	1.44	26.0
###	M	32	4.36	59.1	2.06	28.0
###	F	27	2.91	49.7	2.41	41.1
###	F	42	2.48	50.3	1.97	40.0
###	F	35	3.87	61.2	2.08	32.9
###	F	33	1.56	45.1	1.71	49.4
###	F	28	5.37	64.2	2.43	29.0
###	F	27	6.25	65.5	2.48	26.0
###	M	41	4.26	65.5	1.62	24.9
###	F	34	3.56	47.4	3.15	41.9
###	F	33	3.90	56.3	2.37	34.1
###	F	31	4.56	63.7	1.94	27.1
###	M	56	3.48	51.1	2.55	37.4
###	F	33	1.47	36.5	2.12	52.6
###	F	31	3.10	52.9	2.32	39.6
###	M	23	3.04	55.9	1.91	35.0
###	F	28	4.92	55.5	3.22	36.3
###	F	31	2.76	43.3	2.74	42.9
###	F	48	3.31	63.3	1.58	30.2
###	F	31	3.41	67.0	1.33	26.1
###	M	38	3.52	56.1	2.21	35.2
###	F	28	2.68	51.4	1.99	38.1
###	F	42	3.36	64.1	1.42	27.2
###	F	36	3.78	58.4	2.24	34.6
###	F	33	4.38	68.5	1.59	24.9
###	F	34	3.91	60.1	2.08	32.0
###	F	23	5.72	54.4	3.82	36.3
###	F	35	4.23	73.3	1.05	18.2
###	F	34	5.59	62.8	2.46	27.6
###	F	30	2.17	40.6	2.59	48.6
###	F	32	3.20	56.9	1.95	34.6
###	F	27	2.17	40.8	2.47	46.4
###	F	24	3.79	62.7	1.84	30.4
###	F	24	3.35	53.7	2.31	37.0
###	F	23	2.60	59.5	1.30	29.7
###	F	23	3.85	62.6	1.77	28.7
###	F	23	2.42	54.9	1.60	36.4
###	F	33	3.61	63.8	1.46	25.8
###	M	19	3.85	57.0	2.29	33.9
###	F	34	2.63	42.1	3.08	49.4
###	F	30	2.56	48.4	2.13	40.3
###	F	28	2.01	49.6	1.59	39.3
###	F	30	3.38	55.0	2.13	34.7
###	F	81	1.90	51.5	1.36	36.9
###	F	22	2.80	52.8	1.65	31.1
###	F	30	1.81	45.5	1.81	45.5
###	F	24	2.61	48.4	2.28	42.3
###	M	27	2.41	56.4	1.37	32.0
###	F	43	5.58	58.9	3.13	33.1
###	F	43	5.00	50.0	2.00	30.0
###	M	38	2.36	51.2	1.83	39.6
###	M	34	1.44	38.4	1.82	48.7
###	F	39	7.87	70.2	2.40	21.4
###	F	32	4.54	70.6	1.43	22.2
###	M	51	4.97	52.9	3.18	33.8
###	M	28	2.55	42.6	2.92	48.7
###	M	34	4.84	60.3	2.47	30.8
###	M	33	5.00	63.9	1.99	25.4
###	F	30	2.40	59.7	1.18	29.4
###	F	29	2.48	56.1	1.69	38.2
###	M	23	1.97	47.8	1.66	40.3
###	M	34	3.47	51.7	2.31	34.4
###	M	37	3.59	57.4	1.95	31.2
###	M	47	2.86	48.7	2.33	39.8
###	M	33	3.71	58.9	2.11	33.4
###	M	25	4.05	63.5	1.63	25.5
###	M	28	1.55	38.9	1.88	47.2
###	F	37	3.32	49.3	2.89	42.8
###	M	63	1.94	53.5	1.24	34.3
###	M	32	3.44	63.0	1.41	25.8
###	M	36	4.53	56.1	2.93	36.3
###	M	35	2.73	53.4	1.86	36.3
###	F	38	2.78	54.2	1.93	37.6
###	M	29	2.94	47.6	2.26	36.6
###	F	32	4.65	67.2	1.58	22.8
###	M	29	3.04	49.4	2.28	37.0
###	F	32	2.61	50.3	2.12	40.8
###	M	31	3.79	55.2	2.49	36.4
###	F	49	4.70	66.3	1.87	26.4
###	M	24	2.57	55.3	1.61	34.6
###	F	26	3.32	53.1	2.36	37.8
###	M	38	4.18	62.3	1.65	24.6
###	F	29	2.78	51.5	2.12	39.3
###	M	30	3.90	63.8	1.57	25.7
###	F	32	3.36	49.2	2.74	40.2
###	M	28	2.82	48.7	2.41	41.6
###	M	29	4.27	59.0	2.16	29.8
###	F	32	3.35	58.0	1.91	33.1
###	M	32	2.60	48.4	2.04	37.9
###	M	36	4.08	53.3	2.87	37.4
###	M	29	3.95	67.6	1.23	21.1
###	M	33	4.56	53.8	2.98	35.1
###	M	33	4.03	54.4	2.53	34.1
###	M	40	2.91	53.3	2.08	38.1
###	M	22	3.26	53.5	2.19	36.0
###	M	28	3.65	46.6	3.38	43.1
###	M	49	4.62	60.6	1.94	25.4
###	F	39	4.40	56.8	2.75	35.5
###	M	31	2.39	49.2	1.93	39.7
###	M	20	1.59	39.6	1.92	47.8
###	F	32	2.25	33.6	3.56	53.1
###	M	25	3.59	58.9	1.66	27.2
###	F	41	3.90	61.5	1.99	31.4
###	M	37	3.17	52.9	2.18	36.3
###	M	23	4.21	52.8	3.18	39.9
###	M	28	4.57	57.6	2.56	32.2
###	M	34	2.29	52.5	1.51	34.6
###	M	44	4.65	64.9	1.90	26.5
###	M	42	4.61	64.5	1.90	26.6
###	F	25	4.95	55.8	3.20	36.1
###	M	40	2.51	46.4	2.56	47.4
###	M	42	3.85	55.0	2.45	35.1
###	F	30	4.15	65.1	1.68	26.4
###	M	68	4.02	57.9	1.99	28.7
###	M	29	4.97	61.5	2.31	28.6
###	M	38	3.00	51.9	2.26	39.1
###	F	41	3.00	58.1	1.67	32.4
###	M	38	1.75	41.4	1.97	46.6
###	F	23	3.04	59.1	1.71	33.3
###	F	31	6.29	73.8	1.66	19.5
###	M	39	4.23	57.5	2.56	34.8
###	F	30	3.80	59.9	2.04	32.1
###	M	24	2.10	36.4	3.23	56.0
###	M	48	3.08	58.0	1.68	31.6
###	M	35	4.24	56.0	2.73	36.2
###	M	54	4.60	59.0	2.26	29.0
###	M	33	4.08	53.2	2.85	37.2
###	M	24	5.00	58.8	2.86	33.6
###	M	35	3.22	58.0	1.87	33.6
###	M	22	2.16	49.8	1.61	37.1
###	M	25	4.41	60.1	2.05	28.0
###	F	30	4.00	55.9	2.68	37.4
###	M	25	4.86	55.0	3.10	35.1
###	F	31	3.44	50.1	2.44	35.6
###	F	24	2.76	45.1	2.87	46.8
###	M	32	1.98	56.7	1.00	28.7
###	M	41	3.99	61.8	2.02	31.3
###	M	49	3.18	53.7	2.15	36.3
###	F	61	3.55	58.7	1.86	30.8
###	M	52	3.24	62.7	1.47	28.5
###	F	28	4.87	68.2	1.86	26.1
###	M	24	3.76	49.4	3.36	44.2
###	F	39	7.28	70.8	2.09	20.3
###	M	89	3.20	71.9	0.84	18.8
###	M	19	2.36	45.3	2.49	47.8
###	F	31	3.70	54.0	2.26	32.9
###	M	30	1.53	32.6	2.51	53.5
###	M	20	3.50	58.0	1.62	26.8
###	M	34	3.78	56.9	2.35	35.4
###	M	35	3.86	62.6	1.88	30.5
###	M	24	1.51	32.1	2.52	53.5
###	F	38	1.66	57.7	0.91	31.6
###	M	34	3.06	52.7	2.13	36.7
###	F	32	3.20	61.6	1.66	32.0
###	M	40	2.57	47.8	2.17	40.3
###	M	31	2.93	56.1	1.80	34.5
###	M	39	2.89	57.0	1.73	34.1
###	M	26	3.66	63.9	1.35	23.6
###	F	38	3.08	55.3	1.94	34.8
###	F	24	3.35	56.6	2.02	34.2
###	M	33	2.96	54.3	2.05	37.5
###	F	39	4.23	72.3	1.17	20.0
###	M	28	4.11	61.7	1.70	25.6
###	F	31	2.96	59.6	1.57	31.7
###	F	23	3.22	54.2	2.24	37.7
###	M	33	3.13	56.7	2.04	37.0
###	M	25	4.24	57.7	2.00	27.2
###	F	54	3.24	60.1	1.61	29.8
###	M	36	3.75	45.6	3.47	42.1
###	M	32	3.26	53.0	2.25	36.6
###	F	38	2.71	45.1	2.61	43.5
###	M	28	2.74	43.2	2.91	45.8
###	M	31	1.72	39.0	2.17	49.2
###	F	26	1.38	32.6	2.55	60.3
###	M	58	3.39	50.6	2.41	36.0
###	M	31	7.12	61.5	3.16	27.3
###	M	31	4.39	64.4	1.81	26.6
###	M	42	2.89	47.7	2.19	36.2
###	M	26	3.57	48.0	3.12	42.0
###	F	29	8.42	80.0	1.23	11.7
###	M	43	4.17	69.8	1.37	22.9
###	M	48	4.05	56.1	2.66	36.9
###	F	52	3.27	57.7	1.83	32.3
###	F	35	4.19	54.5	2.74	35.6
###	M	40	4.42	62.7	1.98	28.1
###	F	30	2.23	59.5	1.22	32.5
###	F	37	3.75	61.4	1.89	31.0
###	M	38	4.46	64.8	1.82	26.5
###	M	40	2.68	56.2	1.29	27.0
###	F	30	3.70	60.8	1.87	30.7
###	M	49	3.62	64.7	1.46	26.1
###	M	43	2.60	52.4	1.78	35.8
###	F	44	3.06	57.1	1.87	34.9
###	M	39	3.17	53.0	1.92	32.2
###	M	29	2.49	46.0	2.24	41.3
###	M	29	4.41	60.0	2.25	30.7
###	F	76	2.85	60.2	1.34	28.3
###	M	23	4.77	57.9	2.69	32.7
###	M	26	5.19	61.5	2.31	27.4
###	M	27	5.05	68.1	1.58	21.3
###	M	53	4.37	56.8	2.47	32.1
###	F	40	7.43	71.9	2.14	20.7
###	M	25	4.93	58.2	2.92	34.4
###	F	28	6.39	77.9	1.26	15.3
###	F	32	6.74	72.4	2.06	22.1
###	M	59	3.51	53.7	2.21	33.7
###	M	29	4.47	63.0	1.84	26.0
###	M	25	7.20	77.7	1.54	16.6
###	M	29	4.08	52.8	2.83	36.6
###	M	27	5.88	68.5	1.78	20.8
###	M	39	4.95	63.8	2.12	27.3
###	F	40	3.42	51.9	2.68	40.7
###	F	19	2.90	52.8	1.99	36.2
###	F	26	6.16	61.3	3.03	30.1
###	M	21	7.25	78.1	1.47	15.8
###	M	52	2.91	54.6	1.87	35.2
###	M	38	3.68	54.8	1.99	29.6
###	M	21	7.00	75.8	1.51	16.4
###	M	26	5.85	71.9	1.79	22.0
###	F	23	6.24	69.6	2.18	24.3
###	M	40	2.47	43.7	1.96	34.6
###	M	39	3.26	44.2	3.36	45.5
###	F	20	4.66	67.5	1.78	25.8
###	M	24	4.37	59.3	2.34	31.8
###	M	53	6.00	68.2	2.26	25.7
###	M	43	3.86	61.2	1.50	23.8
###	F	26	4.51	57.0	2.65	33.5
###	F	23	6.22	67.5	2.44	26.5
###	M	30	4.46	54.4	2.87	35.0
###	M	23	7.95	72.2	2.20	20.0
###	F	37	4.51	69.3	1.61	24.7
###	M	40	2.49	43.1	1.84	31.8
###	F	32	4.70	56.8	2.83	34.2
###	F	22	4.31	61.9	1.96	28.1
###	M	24	6.13	61.3	2.82	28.2
###	F	23	1.92	42.3	2.03	44.8
###	F	62	5.79	60.2	2.94	30.6
###	M	24	6.77	75.0	1.55	17.2
###	F	22	5.12	61.1	2.75	32.9
###	F	22	3.02	68.9	1.12	25.6
###	F	31	5.87	71.8	1.69	20.7
###	F	51	2.75	51.1	2.10	39.1
###	M	50	4.90	61.9	1.93	24.4
###	M	31	5.09	68.9	1.55	20.9
###	M	33	3.62	66.0	1.21	22.0
###	F	39	4.86	70.7	1.62	23.5
###	M	32	4.10	53.6	2.39	31.2
###	M	24	3.53	58.4	1.88	31.1
###	M	25	4.51	60.7	2.41	32.5
###	M	32	3.76	62.3	1.89	31.3
###	F	63	4.03	68.6	1.41	24.0
###	M	42	4.68	58.1	2.42	30.1
###	F	32	5.56	69.2	1.82	22.6
###	F	22	7.92	70.6	2.59	23.1
###	M	33	4.66	56.2	3.01	36.3
###	M	39	4.80	45.8	4.32	41.3
###	M	47	2.60	41.6	2.54	40.7
###	F	27	5.48	70.4	1.92	24.7
###	M	24	4.57	66.9	1.64	24.0
###	M	28	6.52	71.7	1.91	21.0
###	M	61	3.11	58.8	1.46	27.7
###	M	34	3.28	58.9	1.65	29.6
###	M	31	5.77	70.9	1.79	22.0
###	F	25	4.84	61.3	2.49	31.6
###	M	52	3.88	56.6	2.17	31.6
###	M	58	6.10	59.8	3.09	30.3
###	M	64	3.86	59.2	2.11	32.4
###	M	22	6.10	71.7	1.86	21.9
###	M	28	4.53	66.4	1.63	23.9
###	M	44	5.08	48.2	4.17	39.6
###	F	34	2.89	48.7	2.63	44.4
###	M	44	2.83	56.5	1.66	33.1
###	M	35	2.26	52.7	1.63	38.0
###	F	47	3.24	54.6	2.26	38.0
###	F	65	2.00	52.1	1.41	36.7
###	F	31	3.70	58.3	1.87	29.4
###	M	24	3.56	55.5	2.12	33.0
###	M	42	4.04	58.1	2.36	34.0
###	M	34	4.58	52.2	3.20	36.5
###	M	22	5.39	62.1	2.56	29.5
###	F	26	1.82	46.1	1.32	33.4
###	M	46	3.49	53.0	2.30	34.9
###	F	29	5.56	68.4	1.96	24.1
###	M	26	5.92	76.2	1.31	16.8
###	F	28	3.14	64.4	1.24	25.4
###	F	38	3.21	48.2	2.46	36.9
###	M	62	4.09	59.6	2.13	31.0
###	M	56	3.07	57.2	1.66	31.0
###	M	64	6.38	72.6	1.45	16.5
###	F	61	4.71	60.7	2.40	31.0
###	M	62	2.41	54.0	1.44	32.2
###	F	50	2.41	58.9	1.21	29.6
###	M	56	3.92	64.4	1.52	25.0
###	M	46	5.41	58.2	2.78	30.0
###	F	28	2.83	47.4	2.71	45.5
###	M	57	4.69	59.6	2.44	31.0
###	M	40	3.27	59.3	1.58	28.6
###	F	46	2.65	53.8	1.76	35.8
###	M	52	3.06	51.7	2.00	33.8
###	M	45	3.91	61.2	1.98	31.0
###	M	33	5.57	54.4	3.73	36.4
###	M	38	4.27	66.7	1.15	17.9
###	F	24	5.28	57.6	3.07	33.6
###	M	42	4.41	61.2	2.18	30.2
###	F	25	3.91	56.9	2.48	36.2
###	F	28	5.37	60.9	2.54	28.8
###	M	49	2.48	43.6	2.28	40.1
###	F	54	2.04	44.9	2.05	45.2
###	F	41	1.61	44.0	1.42	38.8
###	M	57	2.45	49.0	1.91	38.2
###	M	30	3.38	44.1	3.24	42.3
###	M	48	6.34	74.8	1.35	15.9
###	M	45	3.28	59.8	1.71	31.1
###	F	36	3.50	65.2	1.43	26.6
###	M	60	3.28	53.6	1.79	29.3
###	M	54	3.22	56.8	1.96	34.6
###	M	43	3.66	61.7	1.55	26.1
###	M	42	3.93	53.1	2.00	27.1
###	M	59	1.91	45.3	1.96	46.4
###	M	58	2.13	44.5	1.83	38.2
###	M	40	2.34	47.7	2.22	45.2
###	F	39	4.98	64.6	2.15	27.8
###	M	45	5.40	59.0	2.93	32.0
###	M	39	3.53	60.4	1.74	29.8
###	M	46	3.94	50.2	3.04	38.7
###	M	29	3.94	56.3	2.23	31.9
###	M	39	5.46	58.1	2.92	31.0
###	M	66	2.30	46.8	1.98	40.2
###	M	23	4.21	73.5	1.00	17.5
###	M	49	3.42	58.6	1.85	31.7
###	F	53	4.08	63.3	1.62	25.1
###	M	33	5.38	64.2	2.02	24.2
###	M	53	7.70	66.3	2.68	23.1
###	F	31	2.47	57.3	1.40	32.5
###	F	56	4.53	57.7	2.39	30.4
###	M	60	2.98	48.1	2.33	37.5
###	M	43	4.09	49.9	3.04	37.2
###	M	23	3.51	50.8	2.78	40.2
###	M	41	2.68	55.7	1.67	34.6
###	M	53	3.44	55.9	1.90	30.9
###	M	58	3.06	55.9	1.75	31.9
###	M	45	2.69	58.9	1.43	31.3
###	M	47	6.58	62.7	3.09	29.5
###	F	27	3.26	57.7	1.82	32.2
###	M	59	5.61	59.9	2.75	29.3
###	M	59	4.55	57.6	2.47	31.3
###	M	24	3.23	56.6	1.73	30.3
###	M	31	3.74	43.4	4.02	46.6
###	F	34	3.46	56.2	2.28	37.0
###	F	56	2.39	51.7	1.89	40.8
###	M	45	2.41	51.9	1.56	33.5
###	M	62	4.41	56.1	2.14	27.2
###	F	52	3.59	56.9	2.24	35.4
###	M	74	2.79	53.0	2.01	38.3
###	F	24	4.29	44.5	4.50	46.6
###	M	38	3.67	54.8	2.27	33.9
###	F	22	3.90	53.1	2.90	39.5
###	M	37	2.78	59.4	1.45	31.0
###	M	27	5.28	61.1	2.40	27.8
###	F	55	3.11	56.5	1.95	35.4
###	M	56	6.30	60.9	3.25	31.5
###	M	62	2.07	46.6	1.75	39.4
###	F	64	3.15	49.8	2.71	42.7
###	M	43	7.50	68.0	2.43	22.1
###	M	45	3.96	60.5	1.89	28.9
###	M	45	5.70	67.5	1.42	16.8
###	M	57	2.84	58.9	1.54	31.9
###	M	39	3.27	59.7	1.83	33.4
###	M	44	2.30	56.7	1.36	33.5
###	M	57	5.22	61.4	2.60	30.6
###	F	47	3.13	71.9	0.90	20.6
###	M	36	6.04	56.9	3.43	32.3
###	F	47	3.32	70.4	1.02	21.6
###	M	59	5.15	67.0	1.89	24.6
###	F	26	3.75	54.9	2.65	38.8
###	F	36	3.16	57.0	1.93	34.8
###	M	56	4.84	68.8	1.48	21.1
###	M	49	2.10	54.7	1.29	33.6
###	M	35	3.68	63.5	1.65	28.4
###	M	48	5.49	53.4	3.84	37.3
###	M	39	2.37	56.8	1.36	32.6
###	M	55	4.86	68.0	1.65	23.1
###	M	43	6.42	68.0	2.30	24.4
###	M	37	3.26	59.6	1.68	30.8
###	M	35	4.11	59.8	1.89	27.5
###	M	44	1.96	48.7	1.55	38.6
###	M	19	4.69	51.6	3.55	39.1
###	M	33	3.38	50.8	2.64	39.7
###	M	25	2.87	51.8	2.10	37.9
###	M	47	4.74	56.5	2.83	33.7
###	M	50	3.30	51.3	2.43	37.8
###	F	33	2.29	54.5	1.57	37.4
###	M	53	3.06	57.1	1.42	26.4
###	M	32	3.51	51.7	2.53	37.3
###	M	59	3.68	56.3	2.21	33.8
###	M	31	3.51	48.5	3.13	43.2
###	M	39	3.07	41.2	3.73	49.9
###	F	35	3.22	57.3	1.97	35.1
###	M	31	3.60	55.3	2.36	36.3
###	M	41	4.99	54.8	2.99	32.8
###	M	31	4.40	49.9	3.43	39.0
###	M	57	3.24	53.8	1.98	32.9
###	M	55	3.03	54.9	1.93	35.0
###	F	26	2.14	44.6	2.17	45.1
###	M	41	2.12	54.6	1.13	29.1
###	M	57	4.71	64.3	1.91	26.1
###	M	60	4.40	56.1	2.71	34.5
###	M	33	5.05	55.0	3.30	35.9
###	M	50	5.78	61.3	2.75	29.1
###	M	41	3.08	51.4	2.18	36.3
###	M	31	2.71	48.4	2.30	41.1
###	M	58	2.72	54.3	1.60	31.9
###	F	71	2.19	57.5	1.07	28.1
###	M	31	3.32	53.3	2.32	37.3
###	M	59	4.50	61.2	2.00	27.2
###	M	26	2.19	39.9	2.62	47.6
###	M	42	3.13	41.5	3.09	40.9
###	M	52	3.45	48.9	2.22	31.5
###	M	39	3.54	57.9	1.85	30.2
###	M	57	5.08	51.5	3.47	35.2
###	F	23	2.80	45.5	2.78	45.2
###	F	36	3.30	46.8	3.01	42.8
###	M	41	3.38	49.5	2.56	37.4
###	F	58	3.85	55.7	2.39	34.5
###	M	42	2.51	60.5	1.03	24.8
###	M	51	4.03	66.3	1.42	23.4
###	M	64	1.88	41.2	2.09	45.8
###	F	42	2.06	46.4	1.87	42.1
###	M	64	4.06	48.8	3.38	40.6
###	F	38	2.71	48.0	2.38	42.0
###	M	57	2.61	58.0	1.35	30.0
###	M	37	4.06	54.7	2.47	33.3
###	M	41	3.51	56.8	2.17	35.2
###	M	34	2.44	50.1	1.87	38.4
###	F	29	5.21	69.7	1.72	23.1
###	F	38	3.26	58.9	1.98	35.8
###	M	40	4.19	55.1	2.62	34.4
###	F	54	2.45	45.4	2.43	45.1
###	M	64	3.88	62.4	1.37	22.0
###	M	55	2.87	59.8	1.35	28.1
###	M	55	1.95	43.5	1.55	34.7
###	M	53	5.14	61.6	2.02	24.2
###	F	31	4.21	64.8	1.83	28.2
###	M	38	3.72	56.9	2.14	32.8
###	M	61	3.11	43.0	3.30	45.5
###	M	30	4.12	60.2	2.09	30.5
###	M	56	3.23	62.0	1.42	27.3
###	M	54	6.13	57.4	3.54	33.1
###	M	56	4.50	59.7	2.21	29.3
###	M	34	3.32	57.6	1.76	30.5
###	M	27	3.01	60.9	1.52	30.8
###	F	33	4.57	59.2	2.68	34.8
###	F	52	6.29	65.9	2.55	26.7
###	M	50	10.87	75.0	2.87	19.8
###	M	23	3.21	54.4	2.14	36.3
###	M	32	4.28	56.1	2.39	31.3
###	F	22	3.49	43.1	3.51	43.3
###	M	28	5.96	64.5	2.73	29.5
###	F	36	4.08	64.3	1.71	26.9
###	F	25	3.18	51.1	2.45	39.3
###	M	42	4.33	60.0	2.08	28.8
###	F	23	5.52	59.8	2.95	32.0
###	F	39	3.31	59.1	1.87	33.4
###	F	28	5.16	60.5	2.69	31.5
###	F	28	3.92	54.0	2.64	36.5
###	M	26	3.00	53.1	2.17	38.4
###	F	35	3.77	58.3	1.89	29.3
###	F	34	2.30	46.6	1.85	37.4
###	M	55	4.10	63.0	1.89	29.0
###	F	22	3.20	57.0	1.88	33.6
###	M	24	10.47	75.9	1.76	12.8
###	F	41	4.90	62.3	2.20	28.0
###	M	27	3.61	53.1	2.51	37.0
###	M	34	4.21	61.4	2.04	29.7
###	M	28	2.53	43.5	2.77	47.5
###	M	31	2.35	52.4	1.75	39.1
###	F	27	4.74	56.3	2.89	34.4
###	F	62	3.10	50.1	2.51	40.5
###	M	45	3.34	46.2	3.16	43.6
###	F	20	2.12	39.5	2.65	49.4
###	F	47	4.74	54.6	3.19	36.8
###	F	28	2.96	44.6	3.11	46.9
###	M	36	3.98	63.9	1.52	24.4
###	F	28	3.00	52.3	2.12	36.9
###	F	40	4.51	69.3	1.52	23.3
###	F	34	2.90	50.1	2.23	38.5
###	F	32	3.85	67.6	1.25	22.0
###	M	50	3.67	62.4	1.59	27.0
###	F	36	3.52	62.8	1.55	27.6
###	M	23	1.94	46.6	1.72	41.3
###	M	48	7.30	72.4	1.86	18.5
###	F	27	2.69	50.4	2.18	40.8
###	M	55	4.21	66.2	1.59	25.0
###	M	31	4.67	63.9	1.98	27.2
###	F	34	5.12	67.2	1.87	24.5
###	M	19	3.08	66.1	1.25	26.8
###	F	26	3.06	51.6	2.36	39.8
###	M	30	7.69	65.1	3.12	26.4
###	M	26	3.63	54.3	2.42	36.2
###	M	21	3.24	51.2	2.45	38.7
###	F	33	4.02	72.9	1.15	20.8
###	F	32	5.42	76.6	1.08	15.3
###	M	58	4.23	57.9	2.37	32.5
###	F	31	2.61	57.4	1.42	31.2
###	F	22	2.95	47.4	2.76	44.3
###	M	20	3.23	57.2	1.93	34.2
###	F	31	4.31	65.0	1.68	25.3
###	M	41	5.27	58.2	2.94	32.5
###	F	42	2.84	58.9	1.58	32.8
###	M	48	6.21	62.9	2.85	28.8
###	F	19	3.43	60.4	1.71	30.2
###	F	35	3.10	57.2	1.73	32.0
###	M	23	4.73	66.4	1.85	25.9
###	F	63	3.46	64.0	1.49	27.6
###	M	38	5.12	62.7	1.91	23.4
###	F	27	3.55	63.1	1.49	26.5
###	F	35	3.28	61.8	1.63	30.8
###	M	31	3.76	61.8	1.83	30.0
###	F	42	3.93	51.8	2.23	29.4
###	M	33	1.79	44.3	1.90	47.0
###	M	35	3.28	52.8	2.42	39.0
###	F	28	2.90	52.4	1.99	35.9
###	M	47	3.57	55.0	2.18	33.6
###	M	29	4.55	56.6	2.57	32.0
###	M	32	2.25	56.7	1.40	35.4
###	F	27	4.08	52.4	2.48	31.9
###	F	34	4.79	73.0	1.14	17.4
###	M	42	4.36	63.9	1.81	26.5
###	F	20	2.13	46.1	2.13	46.1
###	M	48	2.83	45.6	2.39	38.4
###	F	30	2.26	54.1	1.36	32.5
###	M	44	3.57	55.2	1.97	30.4
###	F	30	3.74	55.1	2.43	35.7
###	F	27	3.85	57.8	2.28	34.2
###	F	25	5.82	57.2	3.63	35.7
###	F	28	2.34	43.9	2.49	46.8
###	M	65	3.05	55.1	2.16	39.1
###	F	26	3.29	47.3	3.10	44.6
###	M	52	6.34	63.2	3.10	30.9
###	M	56	5.11	63.7	2.18	27.1
###	F	24	4.19	57.2	2.38	32.5
###	M	49	3.78	45.8	3.35	40.6
###	F	33	4.99	64.7	2.13	27.6
###	M	36	3.69	57.9	2.33	36.5
###	M	31	3.36	61.4	1.63	29.7
###	F	38	2.98	63.1	1.22	25.8
###	M	18	5.28	64.4	1.97	24.1
###	F	37	4.40	55.7	2.77	35.1
###	M	27	4.18	50.8	3.13	38.1
###	F	36	2.37	50.8	1.95	41.8
###	M	37	3.15	49.7	2.50	39.5
###	M	63	3.40	65.0	1.28	24.5
###	F	33	1.92	48.3	1.63	41.1
###	M	40	2.96	48.5	2.06	33.8
###	M	21	2.98	53.8	2.09	37.7
###	F	30	2.08	48.6	1.88	43.8
###	M	47	4.32	62.8	1.68	24.4
###	F	34	2.54	52.4	1.98	40.7
###	F	27	4.59	51.8	3.43	38.7
###	F	38	2.19	48.0	1.79	39.3
###	F	32	3.32	49.7	2.85	42.6
###	M	33	4.06	46.2	3.83	43.6
###	F	36	3.81	65.1	1.49	25.5
###	F	35	3.47	46.8	3.28	44.2
###	F	24	6.52	61.2	3.07	28.8
###	F	31	1.89	40.1	2.26	48.0
###	F	87	5.70	75.3	1.08	14.2
###	F	29	3.72	57.9	2.20	34.3
###	F	31	2.68	53.2	1.86	36.9
###	F	28	3.95	62.1	1.74	27.4
###	F	27	2.67	49.7	2.36	43.9
###	F	43	5.25	74.1	1.20	16.9
###	M	38	3.24	50.9	2.21	34.7
###	M	28	3.18	60.6	1.64	31.2
###	F	23	4.70	67.0	1.87	26.7
###	F	30	2.92	48.2	2.34	38.7
###	M	56	2.80	53.3	2.00	38.1
###	M	50	3.92	60.4	2.00	30.9
###	F	43	6.68	57.6	3.51	30.3
###	F	26	1.06	29.2	2.33	64.0
###	F	27	2.95	55.0	2.04	38.0
###	M	24	2.60	43.2	2.68	44.6
###	F	43	2.42	47.6	2.13	41.9
###	M	45	3.40	58.7	1.70	29.4
###	F	30	3.13	57.1	1.96	35.8
###	F	47	2.78	53.3	1.87	35.9
###	M	36	6.19	75.0	1.57	19.0
###	F	52	3.58	57.9	2.02	32.7
###	F	26	4.01	58.9	2.19	32.2
###	F	27	3.85	57.8	2.28	34.2
###	F	48	7.71	76.3	1.81	17.9
###	F	45	1.97	43.6	2.07	45.8
###	F	32	4.08	59.3	2.21	32.1
###	F	31	2.72	62.9	1.17	27.1
###	F	33	4.15	61.8	2.11	31.4
###	M	42	4.61	68.9	1.59	23.7
###	F	67	2.32	47.3	2.02	41.1
###	M	36	4.58	59.9	2.66	34.8
###	M	28	2.51	54.5	1.61	34.8
###	M	25	3.06	55.7	1.52	27.7
###	M	44	4.18	63.1	1.78	26.8
###	F	25	3.73	66.1	1.36	24.2
###	F	41	3.02	62.3	1.47	30.3
###	F	27	3.50	54.2	2.37	36.6
###	F	23	5.33	60.7	2.77	31.5
###	F	35	3.52	54.8	2.33	36.2
###	M	47	4.87	60.5	2.46	30.6
###	M	29	2.18	51.3	1.54	36.2
###	M	49	3.31	54.9	2.34	38.8
###	F	30	2.57	53.9	1.86	39.0
###	F	37	3.85	67.6	1.13	19.9
###	F	41	4.22	62.7	1.97	29.3
###	F	53	2.31	61.5	1.15	30.6
###	M	38	6.11	68.8	2.08	23.4
###	M	25	3.79	61.5	1.60	26.0
###	F	30	3.04	48.2	2.74	43.4
###	M	36	3.44	56.1	2.09	34.1
###	M	55	4.23	60.2	2.35	33.5
###	M	24	3.12	59.9	1.48	28.4
###	M	35	3.21	50.4	2.58	40.4
###	M	34	5.19	61.0	2.32	27.2
###	F	30	4.84	63.1	2.28	29.7
###	M	34	2.93	54.1	1.86	34.3
###	M	63	1.69	44.6	1.62	42.9
###	F	47	3.45	60.5	1.71	30.0
###	F	26	3.03	54.3	1.81	32.4
###	M	40	2.42	54.2	1.72	38.6
###	F	23	6.11	67.5	1.98	21.9
###	F	24	2.07	55.7	1.24	33.3
###	F	31	2.26	52.0	1.68	38.6
###	F	31	5.13	72.6	1.49	21.0
###	F	34	2.71	58.3	1.66	35.7
###	F	53	2.95	61.6	1.45	30.3
###	M	22	3.77	58.4	2.06	31.8
###	F	30	2.75	48.7	2.36	41.8
###	F	32	3.81	57.0	2.33	34.8
###	M	23	3.85	52.6	2.71	37.0
###	M	44	3.41	54.0	2.11	33.4
###	F	41	4.65	62.5	2.05	27.6
###	F	40	3.69	70.0	1.05	19.9
###	M	42	2.61	48.6	2.31	42.9
###	F	35	4.20	59.1	2.54	35.8
###	M	26	2.04	40.8	2.39	47.8
###	F	25	2.51	41.8	2.95	49.2
###	F	27	4.27	56.7	2.83	37.6
###	F	24	3.11	55.7	1.98	35.5
###	F	23	5.35	61.3	2.61	29.9
###	M	55	3.41	57.6	1.86	31.4
###	M	29	5.07	55.7	3.15	34.6
###	F	29	4.78	59.3	2.66	33.0
###	F	24	4.65	62.6	2.25	30.3
###	M	22	2.78	51.8	2.02	37.6
###	M	29	2.95	54.4	1.74	32.1
###	M	41	3.11	44.1	3.10	44.0
###	F	23	3.86	59.6	1.83	28.2
###	F	30	3.66	56.2	2.36	36.3
###	F	27	2.53	49.8	1.95	38.5
###	M	38	2.54	38.9	3.24	49.5
###	F	29	3.69	52.2	2.36	33.4
###	F	29	4.25	50.1	3.71	43.8
###	F	43	3.73	59.7	1.98	31.6
###	F	53	2.88	50.0	2.23	38.7
###	M	41	2.51	41.0	2.65	43.2
###	F	52	3.00	46.9	2.90	45.3
###	F	30	3.04	50.4	2.46	40.8
###	F	23	4.92	62.1	2.37	30.0
###	M	55	4.22	54.1	2.32	29.7
###	F	24	3.56	56.9	2.26	36.2
###	M	49	2.76	52.4	1.29	24.5
###	F	27	5.83	60.7	3.02	31.5
###	F	34	3.49	59.4	1.67	28.4
###	M	32	3.54	61.7	1.68	29.3
###	M	51	4.01	65.2	1.56	25.4
###	F	30	3.21	61.1	1.55	29.5
###	M	27	3.72	63.5	1.57	26.8
###	F	24	3.20	64.5	1.38	27.8
###	F	40	2.20	61.5	1.11	31.0
###	M	30	2.76	49.3	2.01	36.0
###	F	26	2.51	49.3	2.14	42.0
###	M	30	3.27	60.0	1.50	27.6
###	M	22	2.76	54.8	1.88	37.4
###	M	28	2.84	46.1	2.54	41.2
###	M	30	4.59	57.1	2.43	30.3
###	M	38	2.67	48.0	2.35	42.2
###	F	34	5.49	65.5	2.25	26.9
###	F	26	4.90	52.5	3.49	37.4
###	M	52	4.57	65.1	1.78	25.4
###	M	37	3.69	60.6	1.95	32.0
###	M	31	2.42	42.8	2.55	45.1
###	F	33	2.86	42.9	3.13	47.1
###	F	37	2.63	61.4	1.31	30.5
###	F	28	2.60	55.9	1.54	33.0
###	M	26	3.58	66.0	1.28	23.6
###	F	38	3.35	60.0	1.84	32.9
###	F	24	5.85	58.7	3.13	31.4
###	F	36	3.54	61.4	1.70	29.5
###	F	24	3.23	51.6	2.42	38.7
###	M	28	3.53	52.4	2.49	36.9
###	M	31	4.91	62.6	2.06	26.3
###	F	47	2.46	52.1	1.88	39.8
###	F	58	2.51	48.0	2.19	42.0
###	M	39	3.96	53.6	2.57	34.7
###	F	40	3.31	55.8	1.94	32.7
###	F	35	3.42	57.9	1.80	30.5
###	M	44	3.21	59.7	1.77	33.0
###	M	35	3.71	54.2	2.57	37.5
###	M	23	5.68	69.9	1.80	22.1
###	F	20	3.57	59.6	1.78	29.7
###	M	30	6.12	58.9	3.35	32.2
###	F	35	3.79	65.8	1.30	22.6
###	F	29	2.52	54.0	1.79	38.3
###	F	35	3.41	59.9	1.72	30.2
###	M	52	4.27	56.9	2.44	32.5
###	M	44	4.94	61.9	2.13	26.8
###	F	28	7.36	75.4	1.69	17.3
###	F	28	2.53	57.2	1.56	35.2
###	M	51	3.48	57.2	2.08	34.2
###	M	34	4.31	62.8	1.82	26.5
###	M	57	3.64	63.1	1.70	29.5
###	M	50	4.42	59.4	2.47	33.2
###	M	35	3.98	60.3	1.91	29.0
###	F	34	1.94	43.1	2.14	47.6
###	M	46	2.61	55.8	1.64	35.0
###	F	22	1.73	48.0	1.54	42.8
###	F	24	3.75	47.4	3.33	42.1
###	M	33	4.03	49.4	3.16	38.7
###	F	32	3.34	62.9	1.54	29.1
###	M	37	3.90	64.8	1.55	25.7
###	M	32	3.08	60.7	1.47	28.9
###	M	39	3.90	61.9	1.90	30.2
###	M	36	3.23	58.0	1.51	27.2
###	F	31	3.78	61.3	1.81	29.3
###	F	34	1.87	53.3	1.29	36.9
###	M	48	3.55	54.9	2.19	33.8
###	M	33	4.44	61.4	2.18	30.1
###	M	31	5.44	49.9	4.43	40.8
###	M	56	3.74	65.3	1.56	27.2
###	F	20	4.10	64.7	1.89	29.8
###	M	62	4.34	62.3	1.93	27.7
###	F	22	2.89	57.9	1.65	33.1
###	M	67	2.79	51.7	1.73	32.1
###	F	25	7.64	69.8	2.16	19.8
###	M	22	3.57	48.4	3.16	42.8
###	M	36	3.38	60.1	1.59	28.2
###	M	39	2.62	40.3	3.40	52.2
###	F	29	3.45	52.4	2.63	40.0
###	F	37	1.98	47.5	1.43	34.3
###	F	23	3.59	58.6	1.84	30.0
###	F	55	4.75	60.8	2.46	31.5
###	M	36	2.44	51.2	1.66	34.8
###	F	31	2.90	54.3	2.06	38.6
###	M	49	4.15	66.8	1.62	26.1
###	F	51	4.84	72.1	1.40	20.8
###	F	40	2.61	47.2	2.27	41.0
###	F	31	4.65	64.9	2.01	28.0
###	F	57	3.59	59.2	1.82	30.0
###	F	26	4.03	59.7	2.14	31.8
###	M	40	3.72	51.0	2.66	36.4
###	F	31	2.25	57.7	1.37	35.1
###	M	56	4.01	50.0	2.88	35.9
###	M	35	2.39	52.4	1.88	41.2
###	M	45	5.11	73.3	1.38	19.8
###	M	30	3.71	62.3	1.74	29.2
###	F	23	3.48	63.2	1.60	29.1
###	M	32	2.77	46.0	2.63	43.8
###	M	43	2.72	58.0	1.40	29.9
###	F	28	4.01	58.0	2.12	30.7
###	F	30	3.33	46.7	3.14	44.2
###	F	31	1.94	60.4	0.94	29.3
###	F	29	3.54	55.9	2.12	33.4
###	M	34	3.41	55.5	2.20	35.8
###	F	23	5.27	57.1	3.22	34.9
###	M	35	1.87	49.4	1.30	34.4
###	M	24	1.80	39.6	2.06	45.4
###	M		4.22	48.5	3.66	42.1
###	M	49	3.41	57.7	1.90	32.1
###	M	34	3.42	60.9	1.80	32.0
###	M	48	2.56	42.6	2.94	48.8
###	M	59	3.33	48.2	2.56	37.1
###	F	30	7.05	63.4	2.90	26.1
###	F	28	2.81	49.6	2.18	38.4
###	M	60	2.84	63.8	1.09	24.5
###	F	63	5.16	58.4	2.67	30.2
###	M	45	5.39	66.3	2.20	27.1
###	M	25	5.15	68.3	1.59	21.1
###	F	33	4.26	58.8	2.39	33.0
###	F	31	4.92	59.5	2.69	32.6
###	M	32	3.58	54.4	2.42	36.7
###	F	38	3.25	59.6	1.79	32.8
###	F	37	3.28	55.0	2.12	35.5
###	F	37	2.84	62.9	1.29	28.5
###	F	22	7.66	70.3	2.64	24.2
###	M	37	2.54	60.0	1.34	31.6
###	M	41	2.67	48.7	2.11	38.5
###	M	54	4.00	63.1	1.83	28.9
###	M	54	1.90	40.1	2.24	47.3
###	M	38	4.21	63.1	1.74	26.0
###	F	27	5.03	70.2	1.80	25.1
###	M	52	3.45	55.6	2.02	32.5
###	M	27	3.74	53.5	2.04	29.2
###	M	34	5.93	72.2	1.63	19.8
###	F	29	1.72	45.1	1.40	36.6
###	F	30	3.07	56.8	1.89	35.0
###	M	29	2.73	54.1	1.81	35.8
###	M	36	4.16	65.3	1.62	25.5
###	F	32	2.70	46.6	2.58	44.5
###	F	33	2.70	52.2	2.08	40.2
###	F	30	2.18	50.7	1.70	39.5
###	F	54	3.02	51.0	2.15	36.3
###	F	29	3.48	47.8	3.17	43.6
###	F	26	2.28	48.1	2.07	43.7
###	M	24	3.55	53.2	2.41	36.2
###	M	28	4.34	57.5	2.50	33.2
###	M	32	3.40	52.7	2.43	37.6
###	M	33	3.01	46.2	2.62	40.2
###	M	37	3.01	48.3	2.48	39.9
###	M	50	4.01	59.9	2.17	32.4
###	F	33	2.70	52.9	1.78	34.9
###	M	36	3.77	60.1	1.69	26.9
###	M	20	3.28	49.6	2.04	30.9
###	F	28	4.40	73.7	1.20	20.1
###	F	31	3.73	69.2	1.27	23.6
###	F	51	1.87	46.2	1.88	46.4
###	F	34	4.87	65.3	1.97	26.4
###	M	27	2.66	63.7	1.17	28.1
###	M	33	3.50	49.3	2.39	33.6
###	F	50	3.58	61.2	1.81	30.9
###	M	29	3.45	58.3	1.69	28.5
###	M	53	4.34	55.7	2.77	35.5
###	F	31	2.43	53.1	1.74	38.1
###	M	37	2.84	57.5	1.45	29.4
###	F	53	4.02	62.3	1.85	28.7
###	F	42	3.22	66.4	1.24	25.6
###	F	28	1.77	43.4	1.89	46.3
###	F	26	2.05	45.4	2.00	44.3
###	F	27	3.49	61.1	1.79	31.3
###	F	29	5.31	64.6	2.19	26.6
###	M	33	4.99	64.5	2.07	26.8
###	F	37	3.69	64.1	1.59	27.6
###	F	23	4.09	55.7	2.35	32.0
###	F	29	5.11	59.6	2.79	32.6
###	F	28	2.00	44.5	1.72	38.3
###	F	30	3.96	72.4	1.02	18.6
###	M	58	6.88	75.6	1.69	18.5
###	M	51	4.80	66.9	1.80	25.1
###	M	59	3.98	71.1	1.16	20.7
###	F	36	2.88	51.3	2.09	37.2
###	F	29	3.39	55.9	2.28	37.6
###	M	37	3.13	48.6	2.64	41.1
###	F	26	4.27	59.4	2.10	29.2
###	M	26	5.14	60.7	2.44	28.8
###	F	38	4.24	64.0	1.86	28.1
###	M	73	5.87	72.6	1.51	18.7
###	M	31	5.42	60.0	2.24	24.8
###	F	49	3.41	59.6	1.80	31.4
###	M	29	5.13	60.5	2.26	26.7
###	F	24	2.37	51.7	1.75	38.2
###	M	31	3.40	63.0	1.67	31.0
###	M	45	6.83	58.2	3.85	32.8
###	F	41	4.13	56.1	2.41	32.7
###	F	29	2.90	46.3	2.86	45.6
###	M	26	2.05	46.1	2.07	46.6
###	F	63	3.78	51.4	2.94	39.9
###	M	47	3.79	65.5	1.38	23.9
###	F	31	4.11	52.4	3.21	40.8
###	M	55	2.61	56.1	1.50	32.3
###	M	42	3.60	52.8	2.65	38.9
###	M	36	3.24	46.9	2.61	37.8
###	F	63	2.50	60.1	1.28	30.8
###	M	56	2.40	43.1	2.44	43.8
###	F	31	2.33	42.5	2.39	43.6
###	F	29	5.12	65.1	1.92	24.5
###	M	55	4.88	67.6	1.84	25.5
###	M	29	5.70	66.0	2.23	25.8
###	M	32	3.91	55.6	2.28	32.4
###	M	29	3.31	60.5	1.66	30.3
###	F	26	3.58	62.6	1.67	29.1
###	F	50	5.56	57.7	3.54	36.7
###	F	39	2.49	63.5	1.02	26.0
###	M	32	5.55	60.5	2.85	31.1
###	F	49	2.26	60.3	1.17	31.2
###	F	38	2.15	59.2	1.14	31.4
###	M	20	2.23	49.6	1.90	42.2
###	M	65	3.35	64.6	1.20	23.2
###	M	34	2.30	50.0	1.71	37.2
###	F	28	2.67	54.7	1.80	36.9
###	F	48	3.73	58.8	2.01	31.8
###	M	31	2.58	46.8	2.34	42.5
###	M	43	3.94	61.2	1.97	30.6
###	F	38	2.14	60.2	1.00	28.2
###	M	59	2.67	56.0	1.57	32.9
###	M	29	5.09	59.6	2.64	30.9
###	M	33	3.73	54.2	2.40	34.9
###	F	61	2.75	67.5	1.04	25.5
###	F	30	2.33	52.8	1.69	38.3
###	M	33	3.71	59.0	2.02	32.1
###	F	35	4.11	64.0	1.51	23.5
###	M	26	2.34	46.4	2.12	42.1
###	F	32	3.55	56.0	2.18	34.4
###	M	39	6.48	67.9	2.28	23.9
###	F	45	5.15	68.4	1.84	24.5
###	F	31	3.59	56.2	2.10	32.9
###	M	29	3.02	50.7	2.10	35.4
###	M	51	5.77	72.4	1.59	20.0
###	F	28	4.88	63.0	2.21	28.6
###	M	23	2.91	52.2	1.96	35.1
###	F	37	1.98	47.4	1.76	42.1
###	M	21	1.84	37.2	2.41	48.8
###	F	35	2.27	48.1	2.06	43.6
###	F	23	3.69	57.5	2.17	33.8
###	M	51	2.78	58.1	1.49	31.2
###	M	56	4.32	51.9	3.27	39.3
###	M	35	4.47	63.0	1.99	28.0
###	F	20	2.78	43.4	3.09	48.2
###	F	42	3.44	62.3	1.55	28.1
###	M	26	2.47	50.3	1.87	38.0
###	F	54	3.05	70.4	0.86	19.9
###	M	54	2.97	54.4	1.79	32.8
###	M	22	3.38	64.4	1.36	25.9
###	M	43	2.90	43.5	2.95	44.4
###	F	25	4.02	55.9	2.49	34.7
###	F	37	3.02	53.2	2.08	36.7
###	M	25	3.77	47.8	3.41	43.2
###	M	42	4.01	58.8	2.21	32.4
###	F	26	3.82	54.4	2.63	37.4
###	F	41	2.57	51.2	1.96	39.0
###	F	56	1.85	43.1	1.85	43.0
###	F	55	2.33	45.4	2.45	47.9
###	M	61	3.21	56.5	1.73	30.5
###	F	38	3.09	50.3	2.67	43.3
###	M	38	3.44	58.4	1.82	30.8
###	F	50	2.82	60.6	1.40	30.0
###	F	28	5.24	60.8	2.90	33.6
###	M	28	3.10	59.3	1.57	30.1
###	F	23	2.63	55.0	1.63	34.0
###	F	34	2.80	58.6	1.70	35.6
###	M	53	5.49	60.5	2.47	27.2
###	M	33	3.70	60.5	1.82	29.8
###	M	63	5.16	56.1	3.06	33.2
###	F	23	4.07	45.9	3.93	44.4
###	M	44	4.83	49.7	3.91	40.2
###	M	43	2.14	47.6	1.88	41.9
###	F	24	3.19	59.9	1.70	32.0
###	F	44	3.34	64.6	1.40	27.1
###	F	32	3.90	65.8	1.47	24.8
###	F	50	4.87	64.4	1.96	25.9
###	M	49	1.76	48.3	1.23	33.8
###	M	56	3.46	57.5	1.99	33.1
###	M	43	2.61	59.6	1.18	26.9
###	M	44	4.09	62.7	1.90	29.1
###	M	63	2.27	47.7	1.91	40.2
###	M	53	3.26	64.4	1.29	25.5
###	M	22	2.76	51.2	1.86	34.4
###	F	26	2.82	51.2	2.27	41.2
###	F	24	2.07	47.4	1.93	44.3
###	M	52	2.50	60.1	1.16	27.9
###	M	43	1.88	42.9	1.65	37.8
###	M	32	3.28	56.8	1.80	31.2
###	M	46	3.78	61.6	1.72	28.0
###	M	53	4.01	68.6	1.13	19.3
###	M	48	3.24	53.8	2.25	37.3
###	M	57	3.73	54.9	2.12	31.3
###	F	47	4.18	65.8	1.71	26.9
###	M	39	3.41	60.8	1.60	28.5
###	F	30	2.84	53.9	1.96	37.3
###	F	45	3.13	52.3	2.35	39.3
###	M	58	3.19	58.2	1.69	30.8
###	F	57	4.26	65.1	1.69	25.9
###	M	28	4.77	65.6	1.59	21.8
###	F	44	3.44	60.4	1.85	32.5
###	M	55	4.49	69.1	1.48	22.8
###	F	52	2.85	55.0	1.81	34.9
###	F	48	4.63	63.2	2.13	29.1
###	M	51	2.03	52.1	1.49	38.2
###	M	39	3.44	53.8	2.47	38.6
###	M	52	3.38	52.7	2.41	37.7
###	F	55	4.86	66.8	1.89	26.0
###	M	33	5.88	67.0	1.93	22.0
###	M	49	2.13	38.5	2.72	49.1
###	M	40	5.97	69.2	2.01	23.3
###	M	49	4.78	65.5	1.64	22.5
###	F	53	1.93	49.2	1.60	40.8
###	M	43	3.72	62.0	1.65	27.5
###	F	29	5.82	67.2	2.29	26.5
###	M	51	5.24	69.3	1.82	24.0
###	M	46	2.52	58.4	1.30	30.1
###	M	52	6.30	67.7	2.04	22.0
###	M	37	2.71	62.8	1.29	29.9
###	F	53	4.30	53.9	2.85	35.7
###	M	33	2.10	55.1	1.28	33.6
###	M	58	3.29	62.4	1.37	26.0
###	F	24	3.49	52.0	2.40	35.7
###	M	56	2.97	56.6	1.74	33.1
###	M	42	3.41	57.1	1.95	32.7
###	M	23	2.55	53.1	1.74	36.3
###	M	56	1.41	50.3	1.06	37.9
###	M	58	5.22	61.2	2.60	30.4
###	M	47	2.52	54.8	1.62	35.2
###	F	32	2.89	57.5	1.79	35.7
###	M	21	3.18	53.3	2.25	37.7
###	M	26	4.49	58.2	2.49	32.3
###	M	53	2.31	44.3	2.49	47.7
###	M	48	4.29	63.1	1.91	28.0
###	M	46	1.71	42.3	1.76	43.6
###	M	46	3.80	67.1	1.41	24.9
###	F	50	2.40	58.8	1.33	32.6
###	M	46	2.81	47.7	2.11	35.8
###	M	35	5.62	67.2	2.03	24.3
###	M	39	4.32	67.7	1.61	25.2
###	F	51	2.71	58.6	1.51	32.6
###	M	31	2.49	53.3	1.64	35.1
###	M	44	1.65	35.4	2.34	50.2
###	M	56	1.94	53.6	1.35	37.3
###	M	44	3.82	58.3	2.13	32.6
###	M	44	3.38	57.1	1.83	31.0
###	F	33	2.94	53.7	1.93	35.2
###	M	55	2.41	58.4	1.44	35.0
###	F	56	2.39	41.7	2.14	37.3
###	M	44	2.73	53.8	1.75	34.4
###	F	54	5.04	68.6	1.78	24.3
###	M	28	5.91	68.2	1.96	22.7
###	M	58	2.26	58.6	1.15	29.8
###	M	56	2.65	67.5	0.87	22.1
###	F	43	4.38	56.0	2.83	36.1
###	F	46	3.29	55.5	2.07	34.8
###	M	33	2.70	50.6	2.00	37.5
###	M	40	4.70	59.7	2.48	31.6
###	M	36	2.78	65.8	1.08	25.6
###	M	37	2.91	52.2	2.01	36.1
###	M	52	3.09	59.1	1.58	30.2
###	M	45	5.87	67.0	2.04	23.3
###	M	62	3.00	61.3	1.45	29.6
###	M	56	4.16	72.7	0.97	17.0
###	M	67	2.60	55.1	1.67	35.5
###	M	45	2.68	55.1	1.63	33.5
###	M	19	4.00	57.8	2.37	34.3
###	F	52	2.69	50.1	2.00	37.2
###	F	30	3.81	63.5	1.83	30.5
###	M	31	4.26	72.0	1.18	19.9
###	M	51	2.73	51.2	2.01	37.7
###	M	24	4.50	68.8	1.67	25.5
###	M	41	4.20	54.8	2.64	34.5
###	M	54	3.00	57.7	1.66	31.9
###	M	38	2.46	54.8	1.51	33.6
###	M	47	2.28	51.0	1.63	36.5
###	M	49	4.11	56.5	2.31	31.7
###	M	50	5.27	68.3	1.81	23.4
###	F	25	2.72	46.9	2.58	44.4
###	M	53	3.59	69.9	1.06	20.7
###	F	56	2.16	45.9	1.95	41.5
###	M	51	2.69	53.9	1.59	31.9
###	M	45	1.99	47.1	1.61	38.2
###	F	50	3.36	60.6	1.70	30.7
###	M	47	2.82	50.2	2.17	38.5
###	M	55	4.07	67.3	1.20	19.8
###	M	32	4.99	72.6	1.20	17.4
###	M	38	3.74	58.9	2.09	32.9
###	M	37	2.37	44.9	2.15	40.6
###	M	31	5.63	53.9	3.74	35.8
###	M	49	3.17	50.4	2.33	37.0
###	M	31	2.70	51.5	1.97	37.5
###	M	32	3.13	57.8	1.86	34.4
###	M	59	2.44	60.0	1.30	31.9
###	F	43	4.79	74.6	1.10	17.1
###	M	44	2.33	61.3	1.00	26.3
###	M	54	2.91	58.9	1.53	31.0
###	M	59	3.05	65.6	1.08	23.2
###	M	38	2.45	42.3	2.89	49.9
###	M	49	2.61	55.2	1.51	31.9
###	M	50	2.17	50.5	1.65	38.5
###	M	28	4.00	58.7	2.33	34.2
###	M	30	3.53	52.7	2.64	39.4
###	M	31	2.26	42.8	2.17	41.1
###	M	56	4.53	57.1	2.91	36.7
###	F	25	2.99	41.8	3.33	46.6
###	M	22	2.02	35.4	3.05	53.5
###	F	28	6.82	81.9	1.00	12.0
###	M	49	4.06	55.4	2.28	31.1
###	F	49	3.34	65.8	1.25	24.7
###	M	22	3.13	48.6	2.72	42.3
###	M	18	3.38	53.3	2.41	38.0
###	M	57	3.63	65.3	1.44	25.9
###	M	52	3.41	58.8	1.99	34.4
###	M	42	3.37	57.7	1.88	32.2
###	M	58	2.18	52.6	1.46	35.3
###	F	54	1.74	40.7	1.99	46.6
###	M	30	2.77	52.3	2.04	38.6
###	F	46	5.00	68.3	1.68	22.9
###	M	39	3.78	63.8	1.68	28.3
###	M	50	5.15	61.0	2.30	27.3
###	M	27	4.77	50.5	3.40	35.9
###	M	23	2.77	47.7	2.29	39.3
###	M	33	3.61	57.0	2.01	31.7
###	M	46	2.74	58.8	1.32	28.4
###	F	32	4.03	61.6	1.84	28.1
###	M	40	3.51	59.6	1.85	31.4
###	F	32	2.05	48.5	1.84	43.5
###	M	26	2.70	54.1	1.73	34.7
###	F	41	2.67	51.5	1.76	34.0
###	M	48	4.02	68.4	1.21	20.6
###	F	53	2.91	49.1	2.49	42.0
###	M	22	5.35	57.2	3.00	32.0
###	M	51	6.04	68.0	2.17	24.4
###	M	47	4.33	52.0	3.03	36.4
###	M	31	4.74	69.7	1.46	21.4
###	M	32	2.83	53.6	1.78	33.7
###	F	30	4.00	58.6	2.17	31.7
###	M	49	2.81	52.8	2.05	38.5
###	F	55	2.69	65.8	1.04	25.4
###	M	38	3.49	62.3	1.62	28.9
###	M	27	3.32	53.5	2.30	37.0
###	M	25	2.71	55.3	1.76	35.8
###	M	57	3.05	57.1	1.78	33.3
###	M	35	4.28	61.3	1.77	25.4
###	M	38	2.65	66.3	0.96	24.1
###	F	39	5.58	67.8	2.06	25.1
###	M	45	5.72	60.7	2.57	27.2
###	M	53	2.83	58.9	1.52	31.6
###	M	47	7.50	68.9	2.42	22.3
###	M	49	5.29	64.5	2.03	24.8
###	F	28	2.62	55.6	1.72	36.5
###	M	58	2.36	54.9	1.41	32.8
###	M	33	5.50	64.5	2.38	27.9
###	F	51	2.97	63.3	1.26	26.8
###	M	34	2.70	44.9	2.62	43.7
###	M	50	3.56	54.3	2.35	35.8
###	M	21	3.49	59.2	1.67	28.4
###	M	32	2.12	51.3	1.54	37.3
###	M	52	3.30	66.3	1.22	24.5
###	F	23	2.07	53.2	1.34	34.4
###	M	25	2.32	62.3	1.18	31.6
###	F	32	3.05	56.3	1.93	35.7
###	M	51	2.78	57.1	1.71	35.0
###	M	50	8.28	73.8	1.97	17.6
###	M	55	5.19	65.7	1.73	21.9
###	M	53	3.96	58.7	1.98	29.3
###	M	57	6.94	66.6	2.41	23.2
###	M	39	3.13	54.7	1.74	30.5
###	M	39	3.91	53.3	2.50	34.0
###	M	21	2.13	43.9	2.45	50.4
###	F	24	3.63	62.4	1.74	29.9
###	F	25	4.08	71.4	1.31	22.9
###	M	22	2.81	49.6	2.19	38.6
###	M	49	3.81	57.1	2.27	34.0
###	M	24	3.93	56.8	2.22	32.1
###	M	44	3.26	33.8	5.81	60.1
###	F	40	2.94	56.0	1.90	36.2
###	M	31	3.11	55.2	1.97	34.9
###	F	49	5.01	65.0	2.12	27.5
###	F	49	2.68	48.1	2.21	39.7
###	F	32	3.07	52.9	2.19	37.7
###	F	53	4.48	66.3	1.79	26.5
###	M	52	3.83	54.1	2.71	38.3
###	M	47	4.61	66.2	1.78	25.5
###	M	42	2.63	51.1	2.08	40.5
###	M	24	2.18	44.2	2.33	47.3
###	M	35	2.90	54.4	1.84	34.6
###	M	49	3.55	66.6	1.27	23.8
###	M	57	4.92	63.5	2.04	26.3
###	M	30	4.46	63.1	2.07	29.3
###	M	57	3.31	46.6	2.77	39.0
###	F	23	6.07	61.2	2.99	30.2
###	F	31	1.50	42.9	1.50	43.0
###	M	23	3.70	55.6	2.36	35.5
###	F	24	2.84	61.0	1.37	29.4
###	M	32	6.21	60.1	3.01	29.1
###	M	57	3.36	51.9	2.45	37.9
###	M	58	2.24	50.1	1.64	36.8
###	F	26	3.08	56.3	1.93	35.3
###	M	51	3.13	60.1	1.77	34.0
###	F	58	2.53	51.0	1.87	37.6
###	F	50	1.88	45.4	1.92	46.5
###	M	41	4.61	56.8	2.49	30.7
###	F	36	3.52	46.1	3.57	46.9
###	M	33	7.80	63.8	3.08	25.2
###	F	26	2.39	45.9	2.11	40.6
###	M	55	2.94	50.2	1.93	32.9
###	F	22	3.80	60.8	1.86	29.8
###	M	23	3.35	61.2	1.69	30.9
###	F	67	2.99	53.9	2.24	40.4
###	F	32	3.15	53.7	2.33	39.8
###	F	24	2.22	57.4	1.16	30.1
###	M	23	3.46	50.0	2.56	36.9
###	M	55	3.45	58.5	1.80	30.5
###	M	23	3.96	47.7	3.52	42.4
###	M	21	4.47	57.1	2.69	34.4
###	F	22	3.19	59.2	1.77	32.8
###	M	37	2.27	53.7	1.55	36.6
###	M	22	1.90	45.3	1.80	42.9
###	F	43	3.96	60.2	1.92	29.2
###	F	43	4.96	67.4	1.74	23.7
###	M	17	4.87	54.5	3.34	37.3
###	M	30	3.58	60.1	1.80	30.3
###	M	53	2.92	53.3	1.93	35.3
###	M	33	4.25	53.5	3.08	38.7
###	F	47	3.56	66.6	1.30	24.3
###	M	27	3.81	67.6	1.36	24.2
###	M	43	3.33	52.4	2.42	38.1
###	M	51	4.85	59.3	2.55	31.1
###	F	33	2.24	47.4	2.01	42.5
###	M	55	3.85	47.7	2.73	33.8
###	F	27	3.30	50.6	2.49	38.1
###	F	31	2.05	46.2	2.06	46.3
###	F	25	2.28	45.0	2.22	43.9
###	M	25	4.88	57.2	2.85	33.4
###	F	50	3.15	46.9	2.63	39.1
###	M	26	2.36	46.7	2.05	40.5
###	M	48	2.59	60.5	1.23	28.7
###	M	55	4.46	51.4	3.06	35.3
###	F	22	3.24	58.9	1.81	33.0
###	M	51	6.32	71.4	1.85	20.9
###	F	22	3.59	51.6	2.80	40.3
###	M	55	3.17	54.2	2.09	35.8
###	F	27	3.63	61.3	1.55	26.2
###	M	34	3.51	47.9	3.04	41.5
###	F	60	3.18	56.4	1.93	34.2
###	M	34	3.22	49.6	1.97	30.4
###	M	29	3.46	55.7	2.31	37.2
###	M	56	4.00	63.1	1.78	28.1
###	M	31	4.86	45.7	4.70	44.2
###	M	59	3.99	60.7	1.83	27.9
###	M	31	2.91	58.1	1.51	30.1
###	M	32	4.41	60.0	1.96	26.7
###	M	36	3.72	56.4	2.24	33.9
###	M	49	3.75	51.7	2.84	39.2
###	M	37	4.26	60.0	2.37	33.3
###	F	40	3.22	56.3	2.15	37.6
###	F	17	3.50	62.3	1.57	28.0
###	M	34	3.10	59.9	1.58	30.6
###	F	37	4.06	68.8	1.40	23.7
###	M	38	3.78	49.1	3.00	39.0
###	F	38	5.09	58.8	2.81	32.4
###	F	27	4.81	68.4	1.58	22.4
###	F	32	6.31	71.7	1.92	21.8
###	M	54	2.19	56.7	1.23	31.9
###	M	33	2.98	55.3	1.96	36.4
###	F	43	3.47	55.5	2.07	33.1
###	F	45	3.37	53.1	2.23	35.1
###	M	47	4.16	42.5	4.77	48.7
###	F	47	2.98	61.6	1.34	27.7
###	F	55	2.61	54.2	1.75	36.3
###	F	45	5.37	68.2	1.85	23.5
###	F	25	2.85	58.7	1.60	32.9
###	M	57	4.22	67.6	1.31	21.0
###	M	26	1.86	44.3	1.93	45.8
###	M	42	2.89	63.1	1.11	24.2
###	M	30	2.24	58.4	1.33	34.6
###	F	42	3.62	53.9	2.42	36.1
###	M	42	2.79	55.0	1.68	33.1
###	F	23	3.81	57.2	2.35	35.2
###	M	38	3.37	46.6	3.05	42.2
###	M	50	6.07	60.3	2.86	28.5
###	M	26	5.09	62.2	2.28	27.9
###	F	42	3.49	50.4	2.61	37.7
###	M	56	4.12	65.1	1.59	25.1
###	M	41	3.72	55.5	2.36	35.2
###	F	30	5.25	63.5	2.37	28.6
###	M	89	2.77	51.3	2.21	40.9
###	F	30	3.17	53.3	1.91	32.0
###	M	22	4.46	61.0	2.14	29.2
###	F	25	2.31	42.6	2.54	46.9
###	F	27	3.23	68.0	1.14	24.0
###	F	68	3.11	51.6	2.27	37.6
###	F	24	4.54	47.7	4.21	44.3
###	F	29	6.31	67.1	2.21	23.5
###	M	47	4.45	61.9	2.11	29.3
###	M	38	4.26	68.6	1.49	24.0
###	F	23	3.95	69.0	1.33	23.3
###	F	24	3.48	54.8	2.19	34.5
###	M	47	2.97	57.3	1.73	33.5
###	M	33	5.57	68.7	1.78	22.0
###	F	21	4.17	53.7	3.07	39.6
###	F	27	2.85	54.6	1.67	32.1
###	F	32	2.61	57.7	1.35	29.9
###	F	51	2.06	53.7	1.22	31.9
###	F	41	3.07	65.6	1.24	26.4
###	F	28	3.80	61.3	1.86	30.0
###	M	44	3.57	41.4	3.31	38.4
###	M	48	3.24	64.3	1.09	21.6
###	M	29	2.91	48.6	1.85	30.9
###	M	44	3.34	54.1	2.27	36.7
###	M	38	3.23	48.2	2.68	40.1
###	F	35	4.23	55.8	2.59	34.2
###	M	39	2.98	54.6	1.96	35.8
###	M	31	4.23	46.7	3.46	38.2
###	M	27	2.73	47.4	2.36	41.0
###	M	28	4.83	64.9	2.01	27.0
###	F	18	2.97	48.7	2.60	42.6
###	M	32	1.99	44.5	1.94	43.3
###	M	45	1.77	53.2	1.07	32.1
###	F	53	3.86	51.4	2.84	37.8
###	M	50	2.88	57.2	1.64	32.6
###	M	50	2.62	49.3	2.06	38.9
###	F	48	1.94	33.6	3.25	56.2
###	M	30	5.20	59.8	2.77	31.8
###	M	46	3.38	47.7	3.05	43.0
###	M	46	3.57	54.2	2.44	37.1
###	M	49	2.74	54.0	1.69	33.3
###	M	59	4.81	53.6	3.19	35.6
###	F	20	2.06	46.3	1.70	38.2
###	M	46	4.02	57.0	2.26	32.1
###	M	26	2.57	40.8	2.93	46.4
###	F	51	3.21	57.8	1.89	34.0
###	F	29	2.83	56.1	1.91	37.8
###	M	57	3.66	48.7	2.94	39.1
###	M	61	3.00	46.6	2.34	36.4
###	F	32	4.11	60.1	2.24	32.7
###	M	29	5.14	56.5	3.14	34.4
###	F	37	3.81	54.4	2.63	37.5
###	F	32	5.49	65.8	2.19	26.3
###	F	50	3.91	57.4	2.22	32.6
###	M	30	2.72	51.9	1.93	36.8
###	F	52	2.16	56.5	1.26	32.9
###	M	52	2.84	52.2	1.80	33.1
###	M	21	2.68	47.8	2.33	41.6
###	M	53	2.79	54.7	1.80	35.3
###	M	28	4.34	58.9	2.07	28.1
###	M	23	4.09	68.5	1.48	24.8
###	F	41	3.74	54.2	2.53	36.7
###	M	30	2.95	50.4	1.96	33.5
###	M	59	2.10	48.3	1.52	34.9
###	M	22	3.90	59.9	1.98	30.4
###	F	22	2.07	46.8	1.94	43.9
###	F	32	3.31	54.8	2.06	34.1
###	M	52	5.81	68.0	1.88	22.0
###	M	28	7.07	57.2	3.69	29.8
###	M	26	2.91	51.0	2.17	38.1
###	M	31	4.61	59.6	2.54	32.8
###	F	38	3.35	58.6	1.83	32.0
###	M	31	4.09	61.4	2.00	30.1
###	M	21	3.22	52.0	2.52	40.7
###	M	56	5.56	66.7	2.16	25.9
###	M	52	4.50	64.1	1.89	26.9
###	F	54	3.02	56.4	1.84	34.5
###	F	36	4.47	70.7	1.37	21.7
###	F	33	2.89	54.6	1.76	33.2
###	M	56	3.12	59.2	1.64	31.1
###	M	23	3.02	69.2	1.02	23.3
###	F	47	5.01	55.5	3.24	35.8
###	F	35	2.93	66.9	1.06	24.2
###	M	33	2.76	46.2	2.41	40.2
###	M	57	6.18	66.1	2.24	24.0
###	F	55	1.75	51.5	1.25	36.9
###	M	52	3.14	48.7	2.51	39.0
###	M	24	4.35	63.8	1.87	27.5
###	M	28	4.15	59.2	2.14	30.6
###	M	58	5.63	76.1	1.18	16.0
###	M	38	10.47	72.9	2.64	18.3
###	M	43	3.18	51.5	2.61	42.2
###	M	28	3.76	64.0	1.61	27.4
###	F	21	4.53	56.7	2.50	31.3
###	M	56	4.80	63.6	2.09	27.7
###	M	50	4.40	62.1	1.91	27.0
###	M	59	3.32	54.1	2.08	33.9
###	M	23	3.96	51.1	3.13	40.3
###	F	24	2.30	44.8	2.36	45.9
###	M	26	2.21	47.6	2.03	43.8
###	M	22	3.68	66.5	1.48	26.8
###	F	34	2.70	51.0	2.11	39.8
###	F	27	3.71	58.6	1.91	30.1
###	M	33	5.62	63.2	2.48	27.8
###	M	56	2.18	60.7	1.12	31.2
###	M	33	3.94	67.0	1.35	23.0
###	M	32	3.09	61.5	1.47	29.3
###	F	25	2.62	56.7	1.38	29.8
###	M	30	4.88	61.4	2.40	30.2
###	M	58	2.06	42.7	2.32	48.0
###	F	22	4.14	62.1	2.09	31.3
###	F	23	3.63	61.3	1.81	30.6
###	F	31	4.81	59.9	2.62	32.5
###	F	50	3.67	63.6	1.66	28.7
###	M	24	2.57	53.1	1.69	34.9
###	F	25	3.86	65.7	1.43	24.3
###	F	56	1.88	57.2	1.08	32.8
###	M	50	5.11	57.3	3.02	33.8
###	F	35	4.64	65.8	1.86	26.3
###	F	28	5.54	63.1	2.31	26.3
###	F	54	2.01	60.7	0.98	29.6
###	M	18	4.67	61.7	2.02	26.7
###	M	21	1.97	52.6	1.42	37.9
###	M	40	3.06	52.0	1.98	33.6
###	M	54	2.23	45.0	2.11	42.5
###	M	25	2.31	49.9	1.76	38.0
###	F	33	3.62	59.3	1.98	32.5
###	F	33	3.91	64.5	1.32	21.8
###	M	57	3.71	58.1	2.05	32.1
###	M	58	1.83	47.8	1.56	40.7
###	M	23	3.78	57.0	2.20	33.2
###	M	54	4.15	68.2	1.25	20.6
###	M	26	3.86	70.6	1.16	21.2
###	M	54	3.73	57.7	2.20	34.0
###	M	55	3.26	63.4	1.47	28.7
###	F	29	2.94	54.7	1.95	36.2
###	F	39	2.01	50.9	1.45	36.8
###	F	26	5.86	66.9	2.33	26.6
###	F	27	4.57	62.7	2.22	30.4
###	M	31	3.66	57.3	2.16	33.8
###	F	44	3.05	54.7	2.11	37.8
###	M	27	5.41	59.4	2.83	31.0
###	F	24	2.81	53.4	1.72	32.7
###	M	59	3.38	73.3	0.73	15.8
###	F	25	2.99	45.4	2.85	43.3
###	M	46	4.55	59.7	2.50	32.9
###	F	40	2.25	50.8	1.74	39.3
###	M	50	4.61	59.9	2.32	30.1
###	F	24	3.55	58.7	2.00	33.1
###	M	48	8.07	75.8	1.86	17.5
###	M	59	5.80	69.0	1.87	22.3
###	M	54	3.91	66.5	1.41	23.9
###	F	54	2.62	60.3	1.33	30.6
###	F	34	2.22	57.2	1.23	31.7
###	F	20	1.77	60.6	0.91	31.2
###	M	43	2.82	57.5	1.66	33.9
###	M	25	2.93	53.8	1.85	33.9
###	M	40	5.12	69.0	1.70	22.9
###	F	44	3.43	50.4	2.73	40.0
###	M	58	2.24	58.9	1.12	29.5
###	M	27	3.24	54.5	2.17	36.5
###	M	22	2.89	60.9	1.23	25.9
###	F	26	4.14	53.9	2.77	36.2
###	F	43	3.73	62.3	1.82	30.4
###	F	37	3.33	67.1	1.15	23.2
###	M	58	6.88	73.8	1.90	20.4
###	M	33	5.39	63.7	2.39	28.3
###	M	55	4.42	66.9	1.58	23.9
###	M	24	7.39	78.8	1.35	14.4
###	M	46	3.86	59.5	1.98	30.6
###	F	29	2.36	45.6	2.25	43.4
###	F	24	3.15	61.0	1.49	28.9
###	M	55	3.60	69.0	1.09	20.9
###	F	38	3.10	62.0	1.14	22.8
###	M	55	4.82	61.4	2.44	31.0
###	F	35	2.36	50.3	1.91	40.6
###	F	74	3.18	55.6	2.07	36.2
###	F	30	4.35	61.3	2.16	30.4
###	M	24	4.94	67.1	1.83	24.8
###	M	26	7.28	71.2	1.83	17.9
###	F	40	2.37	46.0	2.37	46.0
###	M	34	4.08	65.5	1.51	24.3
###	M	22	2.78	56.2	1.55	31.3
###	M	57	4.11	59.2	2.08	29.9
###	M	57	2.25	66.4	0.71	20.9
###	M	22	3.36	54.0	2.34	37.6
###	F	49	3.29	58.6	1.89	33.7
###	M	19	4.28	59.4	2.33	32.4
###	M	58	3.75	63.0	1.55	26.0
###	M	55	6.11	74.2	1.62	19.7
###	M	40	3.77	59.5	1.82	28.8
###	F	50	3.59	57.9	2.16	34.8
###	M	55	8.37	69.4	2.98	24.6
###	M	55	5.45	70.9	1.54	20.0
###	M	62	4.65	54.6	3.18	37.3
###	M	23	3.20	61.8	1.58	30.6
###	M	50	2.87	43.1	2.74	41.1
###	M	21	4.33	65.4	1.75	26.5
###	F	29	2.15	42.1	2.54	49.8
###	M	55	2.68	55.3	1.74	35.9
###	F	31	4.28	75.2	1.10	19.3
###	F	53	3.09	72.0	0.88	20.5
###	M	50	3.81	60.1	1.95	30.8
###	F	38	3.64	58.0	1.94	30.9
###	M	27	3.43	53.4	2.44	37.9
###	M	38	2.91	57.8	1.64	32.5
###	M	30	2.36	46.4	2.14	42.0
###	M	40	4.06	59.7	2.11	31.0
###	M	26	5.25	62.7	2.12	25.3
###	M	40	4.01	52.1	2.92	37.9
###	F	26	1.56	45.1	1.52	43.9
###	M	23	2.67	46.0	2.28	39.2
###	M	25	2.50	50.1	1.86	37.3
###	M	50	6.59	67.6	2.16	22.1
###	F	20	4.31	61.5	1.87	26.7
###	M	22	2.37	53.1	1.60	35.9
###	F	51	3.73	59.6	1.96	31.3
###	M	53	4.37	60.1	1.91	26.3
###	F	27	1.78	48.7	1.31	35.9
###	M	55	3.17	65.8	1.24	25.7
###	F	29	1.28	32.8	2.12	54.4
###	M	55	3.31	64.1	1.25	24.2
###	F	35	5.47	67.2	2.22	27.3
###	M	32	2.03	40.6	2.42	48.4
###	F	29	3.48	50.4	2.58	37.3
###	M	55	2.83	50.3	1.78	31.6
###	M	44	3.75	59.6	1.75	27.8
###	F	29	3.23	54.6	2.18	36.9
###	F	34	2.46	62.8	1.05	26.9
###	F	43	4.49	61.6	1.99	27.3
###	M	56	3.10	60.0	1.49	28.8
###	F	39	2.09	53.9	1.39	35.9
###	F	23	2.76	57.2	1.59	33.0
###	M	20	3.66	54.2	2.53	37.5
###	F	59	4.51	55.2	3.04	37.3
###	M	56	1.69	33.0	2.69	52.4
###	M	27	3.13	50.4	2.52	40.5
###	M	35	3.64	55.5	2.33	35.6
###	F	40	2.98	55.7	1.78	33.3
###	M	37	3.40	57.5	1.96	33.1
###	M	27	7.90	60.1	3.75	28.6
###	M	47	2.63	51.6	1.98	38.9
###	M	25	3.95	67.8	1.26	21.6
###	M	55	4.64	69.6	1.47	22.1
###	F	81	3.67	45.3	3.80	46.9
###	M	33	5.79	63.1	2.61	28.4
###	F	40	4.70	65.1	1.85	25.6
###	M	31	4.78	61.2	2.47	31.7
###	M	25	3.36	49.1	2.68	39.1
###	M	30	3.89	63.8	1.55	25.5
###	F	50	2.45	55.2	1.59	35.8
###	M	28	2.59	50.0	2.09	40.3
###	M	57	6.02	73.1	1.50	18.2
###	F	25	2.44	57.4	1.43	33.6
###	M	28	3.81	52.5	2.44	33.7
###	M	26	4.48	50.3	3.39	38.0
###	M	58	3.87	63.6	1.59	26.1
###	M	42	5.67	62.9	2.26	25.1
###	F	34	4.28	54.5	3.05	38.9
###	M	44	1.97	39.4	2.56	51.2
###	F	26	2.84	51.5	1.48	26.8
###	M	42	5.60	65.2	2.38	27.6
###	F	28	2.07	45.6	1.98	43.6
###	M	26	2.85	55.2	1.79	34.6
###	M	21	2.62	47.3	2.15	38.9
###	M	27	3.42	54.7	2.25	35.9
###	F	24	4.84	76.2	1.08	17.0
###	M	52	3.65	65.2	1.48	26.4
###	M	25	3.87	49.1	2.81	35.6
###	F	37	2.13	52.5	1.33	32.8
###	F	36	2.95	56.9	1.89	36.5
###	F	37	2.25	53.9	1.37	32.9
###	F	26	7.01	75.2	1.74	18.6
###	F	21	3.83	62.2	1.84	29.9
###	F	41	2.15	51.0	1.58	37.4
###	F	33	2.08	41.6	2.38	47.6
###	M	33	4.03	55.1	2.23	30.5
###	M	35	4.53	51.7	3.09	35.3
###	F	43	3.39	55.9	2.06	34.0
###	F	33	4.49	65.4	1.73	25.2
###	M	32	4.39	63.4	1.77	25.5
###	F	45	3.45	60.4	1.86	32.5
###	F	53	2.03	54.1	1.41	37.5
###	F	46	3.11	61.1	1.41	27.7
###	M	27	3.41	52.4	2.25	34.5
###	M	39	7.16	75.7	1.47	15.5
###	F	23	5.14	65.5	2.04	26.0
###	M	23	4.56	55.9	2.72	33.4
###	M	36	4.40	49.5	3.52	39.6
###	M	39	4.45	70.4	1.44	22.8
###	F	22	2.47	43.9	2.56	45.6
###	M	48	4.11	68.9	1.24	20.8
###	M	28	5.13	52.5	3.80	38.8
###	F	43	4.67	60.2	2.47	31.8
###	F	28	3.87	63.2	1.66	27.2
###	M	53	2.69	48.5	2.16	38.9
###	F	31	1.96	44.5	2.11	48.0
###	M	21	3.32	59.9	1.66	29.9
###	M	27	4.09	61.0	1.92	28.6
###	M	22	2.85	56.3	1.60	31.6
###	M	29	1.86	39.2	2.50	52.6
###	M	38	4.08	64.9	1.74	27.7
###	M	22	3.14	56.5	1.81	32.6
###	F	34	2.69	64.4	1.03	24.6
###	F	43	5.04	70.4	1.47	20.5
###	F	40	4.42	50.3	3.60	41.0
###	F	25	3.01	50.3	2.42	40.4
###	M	46	4.08	66.5	1.54	25.1
###	F	23	3.76	53.9	2.66	38.2
###	M	54	2.39	56.9	1.39	33.1
###	F	43	2.17	49.1	1.78	40.4
###	M	39	3.99	64.7	1.55	25.1
###	M	30	4.00	51.8	2.96	38.4
###	M	39	4.24	54.1	2.66	33.9
###	M	48	2.65	51.6	1.90	37.0
###	M	33	4.78	69.0	1.64	23.6
###	M	16	2.90	53.5	1.91	35.3
###	F	32	2.67	49.3	2.11	39.0
###	M	50	3.98	60.0	2.19	33.0
###	F	32	4.78	61.6	2.55	32.9
###	F	41	4.85	59.4	2.30	28.2
###	M	47	2.78	54.3	1.89	36.9
###	M	33	4.20	70.6	1.16	19.5
###	M	47	2.22	43.8	2.24	44.3
###	F	32	1.81	48.1	1.59	42.3
###	M	41	3.38	60.9	1.37	24.6
###	F	31	1.62	40.7	1.89	47.5
###	M	40	4.50	65.9	1.81	26.5
###	F	41	5.93	74.5	1.57	19.7
###	M	56	4.79	67.4	1.56	22.0
###	M	28	5.67	64.7	1.88	21.5
###	F	46	2.70	55.7	1.82	37.5
###	M	35	1.97	44.3	1.99	44.7
###	F	42	3.31	64.3	1.29	25.0
###	F	26	5.51	63.8	2.65	30.7
###	M	36	2.50	43.5	2.06	36.0
###	F	33	1.84	44.8	1.79	43.7
###	M	28	2.07	44.0	1.71	36.4
###	F	35	4.95	68.0	1.73	23.8
###	M	53	3.57	58.0	1.92	31.2
###	M	38	2.99	53.7	2.10	37.6
###	M	32	3.93	55.2	2.31	32.4
###	F	55	4.88	63.8	2.08	27.2
###	F	46	3.10	55.5	2.03	36.3
###	M	33	3.99	59.6	2.05	30.6
###	M	38	3.11	48.1	2.50	38.7
###	M	26	2.90	47.1	2.36	38.4
###	F	36	2.04	47.7	1.79	41.9
###	F	49	4.04	63.8	1.52	24.0
###	M	43	3.95	67.4	1.46	24.9
###	M	54	6.39	72.5	1.81	20.5
###	M	27	4.14	58.4	2.38	33.6
###	F	31	8.07	65.3	2.90	23.5
###	M	25	2.93	55.0	1.83	34.3
###	M	90	4.50	67.3	1.30	19.4
###	M	32	3.35	55.7	2.00	33.2
###	M	51	5.31	68.1	1.68	21.5
###	M	40	5.23	63.8	1.98	24.2
###	M	31	3.63	55.2	2.28	34.7
###	M	52	4.45	65.9	1.26	18.6
###	M	41	4.46	59.8	2.33	31.3
###	M	52	3.56	40.1	4.58	51.6
###	M	34	2.91	51.7	2.11	37.5
###	F	27	2.79	49.8	2.11	37.6
###	M	46	4.11	63.6	1.67	25.9
###	M	48	3.27	62.4	1.62	31.0
###	M	57	2.69	59.4	1.32	29.1
###	F	54	2.66	47.8	2.23	40.0
###	M	33	2.88	64.9	1.12	25.3
###	M	22	3.49	53.1	2.51	38.1
###	F	31	5.51	66.4	2.37	28.6
###	M	36	3.48	53.9	2.22	34.3
###	M	18	4.56	59.3	2.44	31.7
###	F	22	3.53	59.1	1.94	32.4
###	M	28	3.45	48.8	3.17	44.8
###	M	33	3.59	58.8	1.86	30.5
###	M	58	5.65	55.3	3.53	34.5
###	F	35	4.64	73.0	1.01	15.9
###	F	35	1.71	48.9	1.31	37.4
###	M	48	3.29	55.6	2.09	35.4
###	M	39	6.25	72.3	1.58	18.3
###	F	55	2.89	49.5	2.43	41.7
###	M	48	2.85	57.9	1.37	27.8
###	F	32	2.07	41.6	2.28	45.9
###	M	52	2.44	58.0	1.41	33.6
###	F	35	2.49	49.7	1.88	37.5
###	M	58	4.81	60.3	2.35	29.4
###	M	56	1.65	47.7	1.46	42.2
###	M	90	7.09	72.2	1.72	17.5
###	M	54	3.60	58.9	1.87	30.6
###	M	48	2.64	58.6	1.49	33.1
###	M	24	3.04	55.2	1.83	33.2
###	M	44	2.13	58.6	1.11	30.6
###	M	23	2.34	52.9	1.67	37.9
###	M	48	2.98	58.2	1.47	28.7
###	M	39	3.91	68.3	1.22	21.3
###	M	34	3.58	59.4	1.95	32.3
###	F	37	3.22	58.2	1.93	34.8
###	M	47	5.30	64.5	2.32	28.3
###	M	63	3.84	66.8	0.83	14.4
###	M	47	6.09	64.3	2.21	23.3
###	M	47	2.63	45.5	2.60	45.0
###	M	54	5.15	63.1	2.30	28.2
###	F	29	3.37	65.6	1.32	25.7
###	M	22	3.66	49.9	2.97	40.5
###	M	30	3.72	56.3	1.87	28.3
###	M	35	1.81	53.2	1.18	34.7
###	M	33	3.88	52.8	2.86	39.0
###	M	24	3.55	54.5	2.36	36.3
###	M	64	5.52	71.8	1.55	20.1
###	F	29	3.43	63.9	1.15	21.5
###	M	41	5.91	68.0	1.81	20.8
###	M	34	6.36	65.1	2.79	28.6
###	F	47	4.87	69.4	1.47	20.9
###	M	54	7.37	83.5	1.02	11.6
###	M	34	2.90	59.4	1.36	27.8
###	F	29	3.84	56.5	2.33	34.3
###	M	52	4.45	63.5	1.79	25.6
###	M	41	4.23	58.5	2.25	31.2
###	F	52	3.80	60.0	2.11	33.3
###	F	45	4.68	58.9	2.30	28.9
###	M	53	3.62	67.2	1.38	25.7
###	M	59	2.43	52.4	1.56	33.6
###	M	23	5.28	62.4	2.60	30.7
###	F	24	2.47	53.7	1.59	34.6
###	F	39	2.95	58.4	1.53	30.3
###	M	34	4.52	59.9	2.42	32.1
###	M	30	1.36	35.9	1.86	49.1
###	M	19	5.70	56.3	3.74	36.9
###	M	29	5.05	73.2	1.34	19.4
###	F	38	2.45	57.8	1.23	29.0
###	M	39	3.04	45.9	2.88	43.5
###	M	60	4.01	55.5	2.36	32.7
###	M	18	2.72	44.9	2.72	44.9
###	F	42	2.95	62.2	1.42	30.0
###	M	23	3.33	54.5	1.99	32.6
###	M	27	3.72	57.5	2.21	34.1
###	M	59	2.45	63.2	1.12	28.9
###	M	35	4.37	71.1	1.25	20.3
###	M	62	6.81	71.5	1.75	18.4
###	M	23	2.41	43.0	2.70	48.0
###	F	28	4.38	51.8	3.15	37.3
###	M	48	4.29	66.7	1.35	21.0
###	F	29	3.46	53.9	2.32	36.2
###	F	53	2.10	56.3	1.19	31.9
###	M	23	2.91	56.0	1.85	35.6
###	M	61	4.50	74.4	1.01	16.7
###	M	54	2.51	49.1	1.81	35.4
###	M	55	8.42	87.6	0.74	7.7
###	M	47	3.75	66.4	1.28	22.7
###	F	55	3.12	58.2	1.77	33.0
###	M	41	3.77	59.1	1.90	29.8
###	F	25	3.88	57.1	2.32	34.1
###	F	27	2.39	51.3	1.94	41.7
###	F	36	3.25	63.6	1.34	26.2
###	M	70	2.46	55.4	1.46	32.9
###	M	18	1.97	45.1	1.59	36.4
###	M	55	5.04	70.9	1.38	19.4
###	F	53	2.54	55.6	1.55	33.9
###	F	28	3.13	67.9	1.15	24.9
###	M	25	2.76	46.3	2.76	46.2
###	M	57	3.63	62.4	1.58	27.1
###	F	73	1.62	34.6	2.41	51.5
###	M	29	2.15	48.8	1.75	39.7
###	M	49	2.07	44.5	1.92	41.4
###	M	49	6.15	77.6	1.10	13.9
###	M	42	2.65	44.0	2.64	43.9
###	F	23	2.84	54.5	1.75	33.6
###	M	55	5.44	71.2	1.48	19.4
###	M	58	3.58	66.6	1.33	24.7
###	M	25	2.67	45.1	2.54	42.9
###	M	24	3.54	58.5	1.78	29.4
###	M	56	7.90	79.4	1.44	14.5
###	M	57	3.90	58.6	2.13	32.0
###	M	41	3.15	50.7	2.32	37.3
###	F	23	4.06	54.2	2.95	39.3
###	F	22	3.40	55.0	2.28	36.9
###	F	48	2.53	62.2	1.15	28.3
###	M	54	4.14	62.8	1.84	27.9
###	M	33	2.74	55.7	1.79	36.4
###	M	29	3.17	55.7	1.93	33.9
###	M	26	3.58	47.4	3.04	40.3
###	F	24	3.49	65.4	1.34	25.1
###	F	39	3.73	54.1	2.50	36.3
###	F	44	2.84	57.7	1.44	29.3
###	F	22	6.85	62.8	3.11	28.5
###	M	49	4.49	58.6	2.34	30.5
###	M	39	3.16	54.0	2.06	35.2
###	F	24	4.28	60.9	2.26	32.1
###	M	30	3.41	65.3	1.25	23.9
###	M	56	2.76	53.9	1.91	37.2
###	M	22	1.82	56.8	1.07	33.3
###	M	58	3.59	62.8	1.54	26.9
###	M	60	3.96	59.6	1.90	28.6
###	M	28	1.61	41.0	1.88	47.8
###	F	51	3.83	63.2	1.63	26.9
###	M	50	6.89	75.1	1.67	18.2
###	M	55	4.01	51.8	3.07	39.6
###	M	38	3.10	53.3	2.27	39.1
###	M	28	3.85	48.8	2.89	36.6
###	M	30	2.74	51.3	2.05	38.4
###	M	54	2.86	54.5	1.99	37.9
###	F	38	2.32	51.0	1.69	37.2
###	M	52	3.48	62.0	1.70	30.2
###	M	52	3.98	66.0	1.47	24.4
###	M	36	2.83	61.6	1.38	30.1
###	F	39	3.38	61.7	1.55	28.3
###	F	49	1.99	55.2	1.36	37.8
###	M	19	1.81	43.4	1.89	45.3
###	F	31	2.48	47.4	2.05	39.3
###	F	29	2.64	51.2	1.73	33.6
###	F	21	3.12	63.0	1.39	28.1
###	F	23	4.05	52.4	3.07	39.7
###	F	28	5.37	69.8	1.68	21.8
###	M	41	2.97	57.0	1.67	32.1
###	F	26	3.63	61.1	1.82	30.6
###	M	59	5.14	62.4	2.12	25.8
###	M	56	3.72	65.7	1.26	22.3
###	F	31	1.73	50.7	1.32	38.7
###	M	45	3.53	69.2	1.21	23.7
###	F	28	3.58	64.7	1.47	26.5
###	M	32	6.02	49.5	5.22	42.8
###	M	31	3.77	47.0	3.59	44.8
###	M	53	2.48	46.8	2.29	43.2
###	F	32	3.74	62.3	1.75	29.2
###	M	45	4.46	62.8	1.91	26.9
###	M	59	3.00	59.9	1.45	28.9
###	F	37	3.60	68.3	1.30	24.7
###	F	48	2.03	59.0	1.04	30.2
###	M	55	5.85	57.3	3.20	31.3
###	M	29	3.41	58.1	1.84	31.3
###	M	33	2.93	52.1	2.18	38.7
###	M	55	5.48	74.2	1.30	17.6
###	F	50	5.45	60.5	2.70	30.0
###	M	57	2.64	60.7	1.21	27.9
###	M	31	2.52	61.6	1.24	30.2
###	M	56	3.49	59.3	1.82	30.9
###	F	26	3.21	54.8	1.98	33.8
###	F	27	3.91	56.2	2.44	35.1
###	M	59	4.77	67.1	1.54	21.7
###	M	19	3.71	56.6	2.29	35.0
###	F	31	4.64	57.1	2.88	35.4
###	F	26	3.14	55.7	1.98	35.2
###	F	35	2.13	53.3	1.46	36.6
###	F	24	2.89	52.7	1.89	34.4
###	F	33	3.29	47.4	2.92	42.1
###	M	22	3.07	51.3	2.23	37.2
###	F	21	5.47	59.2	3.15	34.1
###	M	33	3.79	50.3	2.99	39.7
[truncated: 1,484 more rows]
