# Supplementary material
Source: Research Square preprint supplement (doi:10.21203/rs.3.rs-9896586/v1)
Supplement: Supplementary file 3 [file c3822492277fcd5bd6499488.docx]

**Appendix A. Supporting information**

**Supplementary Tables 1-3** contain detailed demographic information and peripheral blood immune cell profiles of the study cohorts, including healthy donors undergoing routine health checkups and patients diagnosed with knee or hip osteoarthritis. These tables provide the complete datasets supporting the age-stratified analyses and body mass index correlation evaluations presented in this study. These supplementary tables are available from the corresponding author upon reasonable request for academic purposes.
