# Supplementary material
Source: Research Square preprint supplement (doi:10.21203/rs.3.rs-9896586/v1)
Supplement: Supplementary file 4 [file f440596d1fafb42db932d833.xlsx]

## Sheet: Sheet1
Name	Gender	Age	Grade	BMI	NEU#	LYM#
####	F	75	4	31.61	4.5	2.7
####	F	72	3	26.9	5.3	2.5
####	F	70	4	27.55	1.4	1.1
####	M	63	3	30.8	7.2	0.8
####	F	67	2	22.21	2.8	1.3
####	F	74	3	28.72	2.5	1.7
####	F	75	4	24.46	4.2	2.6
####	M	65	3	28.4	4.3	1.6
####	F	66	4	24.65	6.5	1
####	F	72	3	25.4	2.7	1.8
####	F	87	3	26.57	3.6	1.3
####	F	72	4	28.89	2.9	2
####	F	62	4	26.17	3.1	2
####	F	79	3	26.03	3.8	1.6
####	F	80	4	25.78	4	1.5
####	F	63	3	32.91	3	1.7
####	F	64	4	31.11	1.8	1.2
####	F	74	3	31.23	2.1	1.4
####	F	71	4	26.84	3.3	2
####	F	59	3	30.11	3.5	3.4
####	M	67	4	29.05	4.7	1.2
####	F	79	3	27.11	3.1	1.9
####	F	80	4	33.33	2.2	1.9
####	M	78	4	23.26	3.3	1.3
####	F	79	3	26.67	3.8	1.5
####	F	73	3	25.39	4.3	1.5
####	F	72	4	32.05	2.8	1.3
####	F	71	4	28.38	5	1.9
####	F	71	4	24.03	4.3	2.8
####	F	65	4	27.06	4.4	1
####	M	61	3	24.22	3.1	2.3
####	F	72	4	29.02	3.2	1.9
####	M	63	4	32.6	2.7	1.5
####	M	63	4	28.73	4.1	1.2
####	F	71	3	29.71	3.3	2.1
####	M	63	3	29.73	4.6	2.2
####	F	65	3	22.98	3	1.7
####	F	71	4	22.37	2.5	1.4
####	F	69	4	29.82	3.8	1.8
####	M	62	3	28.85	4	1
####	F	70	4	24.03	1.4	1.6
####	F	73	4	24.44	2.2	1.8
####	F	64	3	30.2	2.6	1.4
####	F	59	3	21.22	2.8	2
####	M	70	3	26.95	3	0.8
####	F	59	3	29.43	2.5	1.3
####	F	74	4	29.21	2	2.1
####	F	65	3	23.92	2.1	1.3
####	F	73	3	25.96	2.2	1.7
####	F	57	3	26.71	2.7	1.5
####	F	53	4	30.59	1.7	1.4
####	F	69	3	28.24	3.1	2.3
####	F	70	4	23.01	1.7	1.1
####	F	60	4	42.22	4.4	2.4
####	F	63	4	25.71	3	2.1
####	M	66	3	22.18	2.3	1.7
####	F	73	4	25.64	3.5	1.8
####	F	79	3	26.67	3.8	1.5
####	F	71	4	24.03	4.3	2.8
####	F	72	4	27.06	4.4	1
####	F	70	3	24.24	2.5	1.5
####	M	74	3	30.99	5.3	2.7
####	F	79	3	27.11	3.1	1.9
####	F	66	3	30.39	2.4	2.5
####	F	68	3	28.69	2.3	1.5
####	M	63	4	31.04	2	2.3
####	M	77	3	24.61	3	1.7
####	M	48	3	32.77	5.5	2.3
####	M	73	4	27.08	3.9	2.1
####	F	79	3	28.89	5.2	2.9
####	M	82	4	26.57	4.7	1.6
####	M	75	3	23.44	3.2	1
####	M	70	4	21.6	2.3	0.9
####	M	83	4	22.37	3.4	1.9
####	F	58	4	18.54	3.3	1
####	F	73	4	27.87	3.1	1.8
####	F	71	4	29.04	4.5	2.1
####	M	84	4	25.81	3.4	2.2
####	M	63	3	21.87	3.8	2.8
####	F	59	4	30.92	4.4	3.5
####	F	63	3	27.47	4.1	1.6
####	F	68	4	25.63	2.3	1.6
####	F	72	3	25.39	4.2	2.7
####	M	72	3	23.83	2.9	1
####	F	76	4	32.46	4	1.5
####	F	71	3	27.1	2.3	3.8
####	F	62	3	27.1	3.5	1.5
####	F	77	4	27.73	3.3	2.3
####	M	67	3	29.07	3.2	1.3
####	F	60	3	25.67	3.3	1.5
####	F	73	4	23.07	3.8	2.3
####	F	67	4	33.5	2.9	2
####	F	70	3	27.19	4.2	3.7
####	F	76	4	25.81	1.6	1.6
####	F	73	4	27.34	5.4	2.2
####	F	80	3	23.19	2.1	1.2
####	F	53	4	31.25	3.5	2.7
####	F	70	4	29.82	2.2	2.1
####	F	60	4	27.34	2.8	1.4
####	F	70	4	26.95	3	2
####	M	74	3	24.61	2.3	2.4
####	F	60	4	29.38	2.7	1.8
####	M	72	3	32.33	6.7	1.6
####	M	60	3	25.97	2.4	2.3
####	F	62	3	27.77	2.5	2.1
####	F	63	4	23.56	2.3	1.5
####	F	69	4	30.41	2.4	2.4
####	F	70	4	23.19	4.5	1.6
####	F	61	4	26.04	2.8	2.9
####	M	76	3	25.95	3.6	1.1
####	F	62	3	27.06	4.8	2.3
####	F	82	4	26.04	2.7	1.7
####	F	74	4	23.63	2.3	1.1
####	F	58	4	35.38	2.3	2.3
####	F	66	4	32.38	3.2	1.9
####	F	58	4	41.09	1.8	2.5
####	F	71	4	22.66	1.8	1.5
####	M	78	4	20.45	4.4	1.4
####	F	73	3	25	4.7	2
####	F	84	3	28.4	2.9	1.4
####	F	71	3	29.03	3.3	1.6
####	F	63	4	31.49	3.3	3.1
####	F	64	4	27.77	2.2	2.3
####	M	69	4	30.12	3.8	2.8
####	F	61	3	26.04	2.8	1.3
####	F	69	3	21.93	3.3	1.5
####	F	69	3	25.44	3.4	2.1
####	M	83	3	32.83	4.7	1.9
####	M	69	3	28.71	4.7	1.6
####	F	71	3	25.27	2.1	1.6
####	F	77	4	25.44	3	1.8
####	F	75	4	25.71	2.7	1.6
####	F	73	4	23.15	2.8	1.9
####	F	68	3	26.84	2.6	2.6
####	F	71	3	21.32	1.6	1.8
####	F	81	3	26.67	3.5	1.4
####	F	77	3	23.44	3.4	1.9
####	M	78	4	27.76	5.5	1.7
####	F	68	4	23.56	3	1.5
####	F	64	4	27.43	5.5	2.2
####	F	71	3	23.56	2.4	1.4
####	F	63	3	25.04	2.7	2
####	F	68	4	23.47	2.4	1.4
####	M	79	3	25.83	7.7	2
####	M	69	3	31.14	2.9	1.8
####	F	69	4	23.64	3.3	2.6
####	F	74	4	32.47	2.7	1.4
####	F	70	3	26.56	2.8	1.8
####	M	60	3	27.29	6.7	1.3
####	M	72	4	25.06	3.7	1.7
####	F	63	4	33.3	2.5	2.8
####	F	57	3	24.42	3.5	1.4
####	M	60	3	29.02	3.3	2.1
####	M	71	3	28.69	4.1	2.5
####	F	64	3	24.56	3	2.6
####	F	73	3	27.34	2.4	2.9
####	F	66	3	27.41	2.8	1.7
####	F	72	4	27.16	3.1	2.2
####	F	64	3	33.33	3.3	2.8
####	F	85	3	25.08	2.7	1.2
####	M	72	3	24.8	3	1.5
####	F	72	4	35.56	2.7	3.4
####	M	63	4	28.58	4.3	1.7
####	F	73	4	29.82	3.1	1.9
####	F	76	4	25.88	2	1.8
####	F	60	4	26.13	3.5	2.2
####	F	64	4	35.18	2.4	2.5
####	F	77	4	27.06	4.6	1.7
####	F	67	4	34.6	6.3	1.6
####	F	86	4	27.06	3.2	2.4
####	F	66	4	25.7	2.8	2.6
####	F	83	4	23.23	2.1	1.1
####	M	73	3	26.41	3.7	1.7
####	F	83	4	27.64	4	1.9
####	F	54	4	27.12	1.8	1.3
####	M	71	4	21.8	2.5	1.5
####	F	69	3	32.44	2.4	1.6
####	M	62	4	27.76	2.9	1
####	F	79	3	27.89	3.9	3.2
####	F	65	3	25.97	1.7	1.1
####	F	74	4	31.24	2.2	1.4
####	F	56	4	22.22	3.1	2.4
####	F	74	4	26.67	5.7	2.1
####	F	78	4	28.13	3.8	2.5
####	F	68	4	33.32	3.1	1.9
####	F	68	3	27.34	2.2	1.8
####	F	72	4	25.15	3.4	1.7
####	F	54	3	24.14	1.9	2.4
####	F	70	3	22.83	3.2	1.9
####	F	62	3	30.96	3	1.3
####	F	74	4	29.38	2.1	1.1
####	F	79	3	28.13	2.5	2.2
####	F	73	4	34.13	3.4	1.3
####	F	76	4	24.97	3.1	1.9
####	M	76	3	27.22	2.6	2.6
####	M	69	4	24.57	2.1	2
####	M	77	3	21.23	6.3	1.7
####	F	72	3	30.82	6.2	1.9
####	F	79	3	27.94	4.9	3.5
####	F	37	4	28.3	4.8	2.1
####	F	65	4	27.56	5	1.4
####	F	63	4	28.98	2.7	1.3
####	F	77	4	22.7	1.8	2.2
####	F	74	3	31.11	2	1.7
####	F	67	3	34.18	5.3	1.3
####	F	86	4	29.14	2.9	2.1
####	F	61	4	33.59	2.5	3
####	F	59	4	25	2.5	1.4
####	M	58	3	31.25	6.5	3.3
####	M	69	3	25.56	3.4	1.7
####	M	57	4	31.38	3.1	2.1
####	M	82	4	32.42	2.1	1.3
####	M	65	3	25.1	4.6	09
####	M	74	4	29.62	4.1	1.7
####	M	60	3	24.84	3.2	2.1
####	M	75	4	36.73	3	1
####	F	67	3	32.72	3.5	1.6
####	M	67	3	23.6	1.8	1
####	F	68	3	25.56	3.6	2.1
####	F	73	3	37.04	3.5	1.4
####	F	80	3	27.48	2.9	2.6
####	F	77	4	21.83	1.8	1.2
####	F	75	3	24.73	1.6	1.4
####	F	66	4	30.12	3.4	2.1
####	F	68	4	26.04	2.2	2.1
####	F	68	4	27.53	2.1	1.3
####	F	73	3	25.08	2.9	1.3
####	M	74	4	26.4	3	1.2
####	M	71	3	24.22	2.4	1.9
####	F	78	3	23.12	4.5	2.1
####	F	62	4	28.02	3.8	2.7
####	F	57	4	28.62	3.8	1.7
####	F	63	4	27.34	2.9	1.6
####	F	53	3	29.03	2.4	1.2
####	F	76	3	25.36	4.6	1.8
####	M	73	3	27.68	1.9	1.4
####	M	63	3	29.38	3.4	2.3
####	F	75	3	20.96	3.6	1.9
####	M	77	3	21.32	4.7	2.2
####	F	71	4	29.14	3.4	3.2
####	F	67	4	28.34	3.8	1.5
####	F	67	4	25.4	1.5	1
####	F	69	4	26.38	2.6	2.2
####	F	71	3	26.56	5.5	1.7
####	F	51	4	27.92	6.1	2
####	F	72	4	30.76	4.1	1.9
####	F	65	3	29.3	2	1.4
####	M	68	3	19.26	4.2	1.1
####	F	65	4	29.96	2.9	1.9
####	F	73	4	30.48	2.8	2.1
####	M	75	4	24.22	3.6	2.1
####	M	79	3	28.31	3	2.1
####	F	69	3	29.59	1.6	2.2
####	F	72	3	28.86	3.4	2.9
####	M	60	4	27.18	5.9	2
####	F	62	4	23.36	1.8	1.6
####	F	68	4	27.47	5.4	3
####	F	71	3	28.67	4.6	2.7
####	F	77	3	29.48	2.6	1.7
####	F	79	3	26	4.4	2
####	F	63	3	29.3	5.4	1.3
####	F	79	3	26.15	3.2	1.8
####	F	71	3	22.51	2.8	1.5
####	F	74	3	24.03	3.3	1
####	F	61	3	28.13	2.3	1.8
####	M	81	3	25	3.7	1.4
####	F	62	3	29.14	4.6	2.6
####	F	65	4	32.89	3.2	2.1
####	F	66	4	32.03	2.7	2.1
####	F	71	4	25.72	1.7	1
####	F	61	4	24.56	3	0.8
####	F	59	3	23.5	1.7	2.1
####	M	55	3	30.45	3.7	1.5
####	F	71	4	25.32	1.9	1
####	M	76	4	28.36	3.4	2.3
####	F	87	4	28.35	2.8	1.8
####	F	78	3	28.04	2.6	1.7
####	F	76	3	28.3	3.1	1.2
####	F	73	3	24.61	4.2	1.7
####	F	78	4	29.95	2.9	1
####	F	67	4	35.06	4	1.3
####	M	73	4	29.14	3.9	2
####	F	60	3	24.65	2.9	2.3
####	M	54	4	26.85	5.7	2.3
####	F	82	3	22.04	2.5	2.4
####	M	63	3	29.02	3.7	1.6
####	M	77	4	20.62	4.5	0.8
####	F	78	4	25.68	2.6	1.8
####	F	68	3	33.2	2.6	1.3
####	F	65	4	17.91	1.6	1.5
####	F	65	3	23.93	2.7	1
####	F	75	3	24.97	3.6	1.3
####	F	72	3	24.51	3.3	1
####	M	73	4	23.44	2.8	1.9
####	F	77	3	25.63	3.2	1.8
####	F	77	4	27.43	3.4	0.9
####	M	73	3	25.1	4	1
####	F	69	3	24.03	4.6	1.4
####	M	67	3	23.12	8.9	0.6
####	M	62	4	28.13	2.6	1.6
####	F	70	3	31.22	4.9	1.7
####	F	61	3	30.12	3.6	1.8
####	F	69	4	28.07	2.9	2.1
####	M	66	3	27.78	3.5	2.2
####	M	73	3	32.65	3.1	1
####	M	73	3	25.86	3.2	2.2
####	F	76	3	24.12	3.6	3.9
####	F	64	4	35.75	5.3	3.2
####	F	71	4	23.62	2.5	1.5
####	M	68	4	27.24	4	1.4
####	F	73	4	23.73	3.6	1.2
####	F	77	3	26.81	2.3	1.7
####	M	73	4	23.18	2.1	1.7
####	M	76	4	32.05	4.2	1.4
####	M	68	3	28.34	4.1	1.6
####	M	69	4	33.31	2.3	1.2
####	M	66	4	22.89	5.3	2.3
####	F	72	3	20.83	2.7	0.8
####	F	75	4	23.9	2.2	1.8
####	F	75	3	25.78	3.7	1.8
####	F	70	4	27.18	2.6	2.3
####	F	80	4	20.34	3	1.8
####	F	65	4	33.2	2.7	2.3
####	M	80	4	32.89	2.5	1.1
####	F	70	4	24.03	3.2	1.9
####	F	74	3	26.67	3.9	1.7
####	F	78	3	26.98	2.6	1.4
####	F	61	4	34.17	2.9	1.7
####	F	63	4	28.48	3.8	2.1
####	F	73	4	29.84	1.8	0.9
####	F	73	4	32.03	4.1	1.8
####	F	81	3	24	2.1	1.2
####	M	69	4	30.12	3.4	2.7
####	F	66	3	30.86	5.4	2.3
####	F	67	3	28.44	2.9	1.3
####	M	32	4	21.51	2.1	0.9
####	F	68	4	26.67	48	3.2
####	F	81	3	28.89	2.6	1.6
####	F	63	3	22.55	3.5	1.4
####	F	70	4	28.8	4.3	1.5
####	M	60	3	28.03	3.4	1.2
####	M	74	4	29.59	10.9	2
####	M	74	3	25.08	3.8	2.1
####	F	75	3	25	2.2	1.4
####	F	63	4	24.8	2.4	2.3
####	F	68	3	25.89	3.2	1.9
####	F	58	3	27.34	4.2	1.7
####	F	86	4	20.89	3.8	2.5
####	F	77	4	26.01	4	3.1
####	F	63	4	22.83	2.3	1.2
####	F	62	3	27.41	6.2	2.7
####	F	63	3	35.46	3.3	1
####	F	63	4	29.9	2.5	1.8
####	F	72	4	24.64	3.2	2
